# Supplementary material for: Chronic health conditions and poverty: a cross-sectional study using a multidimensional poverty measure
Source: PubMed Central journal article supplement — BMJ Open. 2013 Nov 27;3(11):e003397. doi: 10.1136/bmjopen-2013-003397 (PMC3845066; doi:10.1136/bmjopen-2013-003397), 2013-11-27
Supplement: bmjopen-2013-003397.draft_revisions.pdf [file bmjopen-2013-003397.draft_revisions.pdf]

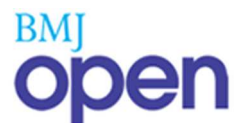

**Health and multidimensional poverty: a cross-sectional study of the impact of certain health conditions on living standards**

|                                 |                                                                                                                                                                                                                          |
|---------------------------------|--------------------------------------------------------------------------------------------------------------------------------------------------------------------------------------------------------------------------|
| Journal:                        | <i>BMJ Open</i>                                                                                                                                                                                                          |
| Manuscript ID:                  | bmjopen-2013-003397                                                                                                                                                                                                      |
| Article Type:                   | Research                                                                                                                                                                                                                 |
| Date Submitted by the Author:   | 13-Jun-2013                                                                                                                                                                                                              |
| Complete List of Authors:       | Callander, Emily; University of Sydney, NHMRC Clinical Trials Centre<br>Schofield, Deborah; University of Sydney, NHMRC Clinical Trials Centre<br>Shrestha, Rupendra; University of Sydney, NHMRC Clinical Trials Centre |
| <b>Primary Subject Heading</b>: | Health economics                                                                                                                                                                                                         |
| Secondary Subject Heading:      | Health policy, Public health, Sociology                                                                                                                                                                                  |
| Keywords:                       | HEALTH ECONOMICS, PUBLIC HEALTH, Health policy < HEALTH SERVICES ADMINISTRATION & MANAGEMENT                                                                                                                             |
|                                 |                                                                                                                                                                                                                          |

SCHOLARONE™  
Manuscripts

## Health and multidimensional poverty: a cross-sectional study of the impact of certain health conditions on living standards

Callander, Emily; Schofield, Deborah; Shrestha, Rupendra

### ABSTRACT

#### Objectives

To identify the health conditions associated with multidimensional poverty.

#### Design

Cross-sectional study of the nationally representative *Survey of Disability, Ageing and Carers*.

#### Setting

Australian population in 2003

#### Participants

35,704 individuals randomly selected from the Australian population by the Australian Bureau of Statistics.

#### Outcome measures

Multidimensional poverty status, income poverty status, costs of disability, SF-6D health utility score, education attainment.

#### Results

Amongst those who were multidimensionally poor, 75% had a chronic health condition and the most common health conditions were back problems (11% of those in multidimensional

1  
2  
3 poverty had back problems), and arthritis (11%). The conditions with the highest proportion  
4  
5 of individuals in multidimensional poverty were depression/mood affecting disorders (26% in  
6  
7 multidimensional poverty) and mental and behavioural disorders (22%). Those with  
8  
9 depression/mood affecting disorders were nearly 7 times (OR 6.60, 95% CI: 5.09 – 8.55,  
10  
11  $p < .0001$ ) more likely to be multidimensionally poor than those with no health condition.  
12  
13 Equivalising for the additional costs of disability increased the proportion of individuals in  
14  
15 multidimensional poverty for all conditions and the conditions with the highest proportion of  
16  
17 individuals in multidimensional poverty changed.  
18  
19

## 20 21 **Conclusions**

22  
23  
24 Due to the influence of certain health conditions on poverty status, health interventions have  
25  
26 the potential to improve national living standards and poverty rates in a similar way that  
27  
28 ‘traditional’ policy responses such as changes to welfare payment currently do. Using a  
29  
30 multidimensional poverty measure reveals the health conditions that should be the focus of  
31  
32 such efforts.  
33  
34  
35  
36  
37  
38  
39  
40  
41  
42  
43  
44  
45  
46  
47  
48  
49  
50  
51  
52  
53  
54  
55  
56  
57  
58  
59  
60

## Article Summary

### *Article Focus*

- Multidimensional poverty status of people with various chronic health conditions
- The influence of costs of disability on multidimensional poverty status

### *Key messages*

- Amongst those who were multidimensionally poor the most commonly reported health conditions were back problems, and arthritis
- Those with depression were nearly 7 times more likely to be multidimensionally poor than those with no health condition
- Equivalising for the additional costs of disability changed the conditions with the highest proportion of individuals in multidimensional poverty

### *Strengths and limitations*

- Uses Australia's first measure of multidimensional poverty
- Takes into consideration education attainment and overall health status (measured by the SF-6D) as well as income when assessing people's poverty status

## INTRODUCTION

Health imparts a massive impact upon an individual's living standards by directly influencing what physical and mental functioning they can undertake. Furthermore, health affects living standards indirectly through limiting education and financial resources: poor health may reduce the ability to undertake education (1-3), and may also limit economic resources through restricting employment (4-7).

In recognition of the importance of good health for adequate living standards, health has been included as a key component of a new poverty measure - the Freedom Poverty Measure. The Freedom Poverty Measure, a multidimensional measure of poverty, sees health and education impacting on living standards in a similar way that low income does (8). Under the Freedom Poverty Measure health status, in part, determines poverty status.

Including health in a measure of poverty provides the opportunity for cross-portfolio responses to improving the living standards of disadvantaged members of society – with health being seen as key contributor to low living standards, health interventions have the potential to be a direct policy response to improving living standards alongside existing measures such as reform to social security arrangements (9). However, different health conditions are likely to have varying impacts upon living standards, with some conditions more severely affecting living standards than others. This paper will look at the relationship between multidimensional poverty and various long term health conditions in the Australian population to determine which health conditions have the largest impact upon living standards and as such their prevention or treatment should be targeted as a cross-portfolio concern.

## METHODS

### *Data source*

The 2003 Survey of Disability, Ageing and Carers (SDAC) provided the data source for this paper. The SDAC provided detailed self-reported data on socio-demographic status, labour force participation, health and disability status, and economic information on individuals and their families<sup>1</sup> (10). The original 2003 SDAC data was weighted by the Australian Bureau of Statistics to represent the whole Australian population in 2003 by broad population variables such as age and sex.

The ABS classified respondent's chronic health conditions according to the ICD-10 health coding system. Lists of what ICD-10 codes correspond with different chronic health condition groups can be found in Australian Bureau of Statistics (10). Respondents with Alzheimer's disease and 'certain conditions originating in the perinatal period' were excluded because of their low numbers (less than 10 respondents) on the SDAC.

### *Identifying those in freedom poverty*

In order to determine how various health conditions impact upon living standards the newly developed Freedom Poverty Measure was utilised to identify those in multidimensional poverty. Under the Freedom Poverty Measure, poverty is defined as having low living standards. It seeks to combine measures of low income, poor health, and insufficient education (Figure 1) as all of these factors are seen to influence living standards. For more detailed information on the Freedom Poverty Measure and other examples of its application see (4, 8, 11-12).

---

<sup>1</sup> At the time of writing this paper the 2003 SDAC was the most current dataset that contains detailed and accurate income, health and education information on the one survey.

1  
2  
3 The Freedom Poverty measure looks at the income, health and education status of individuals  
4  
5 to identify those with multi-dimensional disadvantage:  
6  
7

- 8 - If an individual's family income (measured by the income unit income (13)) is below  
9  
10 the 50% of the median income poverty line then they are considered to have income  
11  
12 disadvantage..
- 13 - If an individual has a poorer health utility score (measured by the SF6D (SF12)  
14  
15 measure (14)) than the average for their age group they are considered to have a  
16  
17 health disadvantage.  
18  
19
- 20 - If an individual has a highest level of education attainment lower than year 12 (for  
21  
22 those aged 25 to 64 years), or lower than Year 10 (for those aged 65 years and over)  
23  
24 they are considered to have an education disadvantage.  
25  
26  
27  
28

29 Based upon an individual's income, health and education, those with income disadvantage  
30  
31 AND either a health or education disadvantage were considered to be in 'freedom poverty'  
32  
33 and to be multidimensionally poor. This Freedom Poverty Measure was designed specifically  
34  
35 for the Australian population in a manner that is consistent with international poverty  
36  
37 measurement practices (15).  
38  
39

#### 40 41 *Statistical Analysis* 42

43  
44 Initially descriptive statistics were utilised to look at the proportion of people in  
45  
46 multidimensional poverty with a long term health condition, the most common conditions  
47  
48 experienced by those in multidimensional poverty, and the proportion of people with various  
49  
50 conditions in multidimensional poverty.  
51  
52  
53  
54  
55  
56  
57  
58  
59  
60

1  
2  
3 Following this logistic regression models were utilised to look at the odds ratio of being in  
4 multidimensional poverty for those with various chronic health conditions. No chronic health  
5 condition was used as the reference condition, and the models were adjusted for age and sex.  
6  
7  
8  
9

10  
11 *Sensitivity Analysis – costs of disability*  
12

13  
14 Ill health can further impact on living standards by imparting additional costs upon  
15 individuals, including the costs of treatment, support services, and medication, and it has  
16 been argued that these costs should be taken into consideration when comparing incomes  
17 (16). Those with long term health conditions are likely to need higher incomes to obtain the  
18 same level of living standards as those with no long term health conditions due to the  
19 additional costs of living for those with ill health. There is a small amount of literature that  
20 has developed a possible means of taking these costs into consideration, internationally this  
21 has been undertaken by Zaidi and Burchardt (16), and within Australia this has been  
22 undertaken by Saunders (17).  
23  
24  
25  
26  
27  
28  
29  
30  
31  
32  
33

34 Using the methods developed by Saunders to measure the costs associated with disability, a  
35 sensitivity analysis was undertaken to look at the difference in the number of people in  
36 multidimensional poverty as a result of accounting for the extra costs of disability. The long  
37 term health conditions associated with multidimensional poverty when the additional costs of  
38 disability in adults were taken into consideration was also examined. It is acknowledged by  
39 the authors that there is a number of limitations to this approach, including the exclusion of  
40 children in the methods developed by Saunders and also possible limitations in the use of  
41 disability classification to estimate the costs of health (18). However, this sensitivity will still  
42 provide an example of how taking into consideration the costs of disability will affect the  
43 financial situation of individuals and hence the numbers in multidimensional poverty.  
44  
45  
46  
47  
48  
49  
50  
51  
52  
53  
54  
55  
56  
57  
58  
59  
60



## RESULTS

There were 35 704 respondents in the SDAC, of these 3 469 were in Freedom poverty. Once weighted these data represented 19 320 000 individuals in the 2003 Australian population in private households, of which 1 857 000 were multidimensionally poor (10%) or in 'Freedom Poverty'. Of the Australian population in 2003, 40% identified that they had a long term health condition.

Amongst those who were multidimensionally poor, 75% identified having a long term health condition. Of those with a long term health condition, 18% were in multidimensional poverty; whereas for those with no long term health condition 4% were in multidimensional poverty (Table 1). Those with a long term health condition were 3 times more likely to be in multidimensional poverty than those with no health condition, after controlling for age and sex (OR 3.38, 95% CI: 3.06 – 3.76,  $p < .0001$ ).

Amongst those in multidimensional poverty the most common health conditions were back problems (11% of those in multidimensional poverty had back problems), arthritis and related disorders (11%), followed by mental and behavioural disorders (9%), hypertension (4%), asthma (4%) and injury/accident (4%). Amongst the individual health conditions, the condition with the highest proportion in multidimensional poverty was depression/mood affecting disorders (26% were in multidimensional poverty), mental and behavioural disorders (22% were in multidimensional poverty), certain infectious and parasitic diseases (22% were in multidimensional poverty), and diseases of the respiratory system (22% were in multidimensional poverty) (Table 2).

After controlling for age and sex there was no significant difference in the likelihood of being in multidimensional poverty between those with no health condition and those with high

1  
2  
3 cholesterol ( $p=0.3794$ ), deafness/noise induced hearing loss ( $p=0.3938$ ), and conditions  
4  
5 grouped by the ABS into ‘other 2003 codes which had no ICD–10 equivalent’ ( $p=0.2993$ ).  
6

7 Those with depression/mood affecting disorders were nearly 7 times (OR 6.60, 95% CI: 5.09  
8  
9 – 8.55,  $p<.0001$ ) more likely to be in multidimensional poverty than those with no health  
10  
11 condition. The odds of being in multidimensional poverty for other health conditions,  
12  
13 compared to those with no health condition are shown in Table 2.  
14  
15

16  
17 Before equivalising income for disability status there were 1 875 000 individuals in  
18  
19 multidimensional poverty. After equivalising family income for the costs of disability in  
20  
21 adults there were 2 462 000 individuals in multidimensional poverty. After equivalising  
22  
23 income for the costs of disability in adults, 82% of people in multidimensional poverty  
24  
25 identified having a long term health condition – an increase of 8 percentage points. Of those  
26  
27 with a long term health condition, 27% were in multidimensional poverty; whereas for those  
28  
29 with no long term health condition 5% were in multidimensional poverty after equivalising  
30  
31 for the costs of disability. Those with a long term health condition were now more than 5  
32  
33 times more likely to be in multidimensional poverty than those with no long term health  
34  
35 condition, after controlling for age and sex (OR 5.57, 95% CI: 5.07 – 6.12,  $p<.0001$ ).  
36  
37  
38

39  
40 After equivalising for the costs of disability in adults, the most common health conditions  
41  
42 amongst those in multidimensional poverty were still arthritis and related disorders (13%),  
43  
44 back problems (12%), mental and behavioural disorders (9%), hypertension (5%) and asthma  
45  
46 (4%). The conditions with the highest proportion of individuals in multidimensional poverty  
47  
48 were diseases of the respiratory system (43% were in multidimensional poverty) and other  
49  
50 diseases of the circulatory system (41% were in multidimensional poverty). The proportion of  
51  
52 individuals in multidimensional poverty in each of these conditions increased after taking into  
53  
54 consideration the costs of disability in adults when equivalising income, and the conditions  
55  
56  
57  
58  
59  
60

1  
2  
3 with the highest proportion of individuals in multidimensional poverty also changed (Table  
4  
5 3).  
6  
7

8 After controlling for age and sex, those with mental and behavioural disorders were nearly 14  
9  
10 times more likely to be in multidimensional poverty than those with no health condition after  
11  
12 equivalising income for disability in adults (OR 13.83, 95% CI: 11.76 – 16.26,  $p < .0001$ ). All  
13  
14 health conditions with the exception of high cholesterol ( $p = 0.9623$ ) were significantly more  
15  
16 likely to be in multidimensional poverty than those with no health condition (Table 3).  
17  
18  
19

## 20 **DISCUSSION**

21  
22  
23 The results have shown that those with a chronic health condition were significantly more  
24  
25 likely to be in multidimensional poverty than those without a chronic health condition, with  
26  
27 18% of those with a chronic health condition in multidimensional poverty, compared to only  
28  
29 4% of those with good health. Furthermore, 74% of those in multidimensional poverty had a  
30  
31 long term health condition.  
32  
33  
34

35  
36 The results of the sensitivity analysis show that after equivalising income for adult disability,  
37  
38 there was a 3 percentage point increase in the proportion of the population in  
39  
40 multidimensional poverty, and a 9 percentage point increase in the proportion of individuals  
41  
42 with ill health in multidimensional poverty. However, there is opportunity to improve the  
43  
44 methods by which costs of ill health are produced by including children in the methodology  
45  
46 and having further consideration as to how health is measured. For example, the large costs  
47  
48 of treating a health condition may result in an individual having only a mild disability. In  
49  
50 spite of this the sensitivity analysis has shown the additional burden health conditions can  
51  
52 have upon living standards – through the economic burden placed upon families as a result of  
53  
54 disability.  
55  
56  
57  
58  
59  
60

1  
2  
3 The most common long term health conditions associated with multidimensional poverty  
4  
5 have been shown to be arthritis and related disorders, back problems and mental and  
6  
7 behavioural disorders – all of which have been shown to be preventable. There are numerous  
8  
9 interventions for each of these conditions that have been shown to be cost-effective in either  
10  
11 preventing the onset of the condition or reducing the severity of the condition (19-22). When  
12  
13 considering the additional costs of low living standards the further benefits of such  
14  
15 intervention programs become more apparent.  
16  
17

18  
19 Using mental and behavioural problems as an example, the benefit of interventions such as  
20  
21 those deemed to be cost effective in Mihalopoulos *et. al.* (23) could not only be listed as  
22  
23 improvements in health status and the associated savings to health care systems, but also the  
24  
25 added benefits of reducing of the number of people in multidimensional poverty. Improving  
26  
27 the health of individuals with mental and behavioural problems will potentially result in 27%  
28  
29 of these individuals no longer being multidimensionally poor and amongst the most  
30  
31 disadvantaged members of society. Furthermore, improving health status may also increase  
32  
33 employment opportunities, with around one quarter of those with mental and behavioural  
34  
35 problems being out of the labour force due to their ill health (24), which is likely to in turn  
36  
37 improve the financial situation of individuals with mental health problems further improving  
38  
39 their living standards. As such, health interventions should be incorporated into policy  
40  
41 responses to improve national living standards.  
42  
43  
44  
45

46  
47 Political rhetoric is currently shifting to advocate the use of cross-portfolio responses to  
48  
49 social issues (25). As such, there is opportunity for consideration of health interventions to be  
50  
51 taken up in government departments other than those traditionally responsible for health care,  
52  
53 and be included alongside other efforts to improve living standards such as education and  
54  
55 skills reform and social security reform. Using the Freedom Poverty Measure reveals the  
56  
57

1  
2  
3 health conditions experienced by the most disadvantaged people in society – those who not  
4  
5 only do they have the lowest incomes, but also have to bear the burden of a insufficient  
6  
7 education and the impact of poor health on their daily living standards – and should be the  
8  
9 focus of political efforts to improve living standards.  
10

## 11 12 Funding

13  
14  
15  
16 National Health and Medical Research Council (NHMRC)

## 17 18 19 Competing Interests

20  
21  
22 None

## 23 24 25 Contributorship

26  
27  
28 EC conceived, designed and led the study. EC undertook data analysis and drafted the manuscript.

29  
30  
31 DS and RS provided guidance on data analysis, and contributed to the drafting of the manuscript. All  
32  
33 authors edited the final manuscript.

## 34 35 36 Data sharing

37  
38  
39 The dataset used in this study, the 2003 Survey of Disability, Ageing and Carers, is publically available  
40  
41 for the Australian Bureau of Statistics upon application.  
42  
43  
44  
45  
46  
47  
48  
49  
50  
51  
52  
53  
54  
55  
56  
57  
58  
59  
60

**REFERENCES**

1. Mushkin SJ. Health as an investment. *The Journal of Political Economy*. 1962;70(5):129-57.
2. Laplagne P, Glover M, Shomos A. Effects of health and education on labour force participation. Canberra: Productivity Commission 2007.
3. Australian Bureau of Statistics. Australian Social Trends, March 2011. Canberra: ABS 2011.
4. Callander E, Schofield D, Shrestha R. Capacity for freedom - a new way of measuring poverty amongst Australian children. *Child Indicators Research*. 2012;5(1):179-98.
5. Schofield D, Shrestha R, Passey M, Earnest A, Fletcher S. Chronic disease and labour force participation among older Australians. *Medical Journal of Australia*. 2008;189(8):447-50.
6. Nepal B, Payne A, Brown L. Healthy, wealthy and wise? The relationship between health, employment and earnings in Australia. Sydney: AMP 2009.
7. Schofield D, Kelly S, Shrestha R, Callander E, Passey M, Percival R. Long term financial impacts of CVD: Living standards in retirement. *International Journal of Cardiology*. 2010;155(3):406-8.
8. Callander E, Schofield D, Shrestha R. Towards a holistic understanding of poverty: a new multidimensional measure of poverty for Australia. *Health Sociology Review*. 2012;21(2):141-55.
9. Swan W. Budget Speech 2011-12. Online: <http://www.budget.gov.au/2011-12/content/speech/html/speech.htm>; Australian Government; 2011.
10. Australian Bureau of Statistics. Information Paper - Basic Confidentialised Unit Record File: Survey of Disability, Ageing and Carers 2003 (reissue) Canberra: ABS 2004.
11. Callander E, Schofield D, Shrestha R. Multi-dimensional poverty in Australia and the barriers ill health imposes on the employment of the disadvantaged. *Journal of Socio Economics*. 2011;40:736-42.
12. Callander E, Schofield D, Shrestha R. Freedom poverty: A new tool to identify the multiple disadvantages affecting those with CVD. *International Journal of Cardiology*. 2013;166(2):321-6.

- 1  
2  
3 13. Australian Bureau of Statistics. Information Paper - Basic Confidentialised Unit Record File:  
4 Survey of Disability, Ageing and Carers 2003 (reissue) Canberra: ABS2005.  
5  
6
- 7 14. Brazier JE, Roberts J. The Estimation of a Preference-Based Measure of Health From the SF-  
8 12. Medical Care. 2004;42:851-9.  
9
- 10 15. Alkire S, Foster JE. Counting and multidimensional poverty measurement. Journal of Public  
11 Economics. 2011;95(7-8):476-87.  
12
- 13 16. Zaidi A, Burchardt T. Comparing incomes when needs differ: Equivalization for the extra  
14 costs of disability in the U.K. Review of Income and Wealth. 2005;51(1):89-114.  
15  
16
- 17 17. Saunders P. The costs of disability and the incidence of poverty. Sydney: Social Policy  
18 Research Centre (SPRC), University of New South Wales2006.  
19
- 20 18. Mont D. Measuring Disability Prevalence, SP Discussion Paper. New York: The World  
21 Bank2007.  
22  
23
- 24 19. Vos T, Carter R, Barendregt JJ, Mihalopoulos C, Veerman L, Magnus A, et al. Assessing Cost-  
25 Effectiveness in Prevention (ACE Prevention): Final Report. Brisbane and Melbourne: University of  
26 Queensland and Deakin University2010.  
27  
28
- 29 20. Puolakka K, Kautiainen H, Mottonen T, Hannonen P, Korpela M, Julkunen H, et al. Impact of  
30 initial aggressive drug treatment with a combination of disease-modifying antirheumatic drugs on  
31 the development of work disability in early rheumatoid arthritis: a five-year randomized followup  
32 trial. Arthritis Rheum. 2004 Jan;50(1):55-62.  
33  
34
- 35 21. Linton SJ, van Tulder MW. Preventive Interventions for Back and Neck Pain Problems: What  
36 is the Evidence? Spine. 2001;26(7):778-87.  
37  
38
- 39 22. Barretta B, Byford S, Knappa M. Evidence of cost-effective treatments for depression: a  
40 systematic review. Journal of Affective Disorders 2005;84:1-13.  
41  
42
- 43 23. Mihalopoulos C, Vos T, Pirkis J, Carter R. The Economic Analysis of Prevention in Mental  
44 Health Programs. Annual Review of Clinical Psychology. 2011;7:169-201.  
45  
46  
47  
48  
49  
50  
51  
52  
53  
54  
55  
56  
57  
58  
59  
60

1  
2  
3  
4  
5  
6  
7  
8  
9  
10  
11  
12  
13  
14  
15  
16  
17  
18  
19  
20  
21  
22  
23  
24  
25  
26  
27  
28  
29  
30  
31  
32  
33  
34  
35  
36  
37  
38  
39  
40  
41  
42  
43  
44  
45  
46  
47  
48  
49  
50  
51  
52  
53  
54  
55  
56  
57  
58  
59  
60

24. Schofield D, Shrestha R, Percival R, Kelly S, Passey M, Callander E. Quantifying the effect of early retirement on the wealth of individuals with depression or other mental illness. British Journal of Psychiatry 2011;198:123-8.

25. Social Inclusion Unit. The Australian Public Service Social Inclusion policy design and delivery toolkit In: Department of the Prime Minister and Cabinet, editor. Canberra2009.

For peer review only



**Table 1: Number of individuals in multidimensional poverty by health status, 2003**

|                                            | <b>In Multidimensional Poverty</b> | <b>Not in Multidimensional Poverty</b> |
|--------------------------------------------|------------------------------------|----------------------------------------|
| Has a long term health condition           | 1 387 000                          | 6 371 000                              |
| Does not have a long term health condition | 449 000                            | 11 113 000                             |

For peer review only

**Table 2: Multidimensional poverty status of those with varying long term health conditions, 2003**

| Long term health condition                                           | Total number | Proportion in multidimensional poverty | Number in multidimensional poverty | OR   | 95% CI    |       | p-value |
|----------------------------------------------------------------------|--------------|----------------------------------------|------------------------------------|------|-----------|-------|---------|
| No condition                                                         | 11 562 248   | 4%                                     | 488 700                            |      | REFERENCE |       |         |
| Depression/ mood affective disorders                                 | 208 400      | 28%                                    | 57 300                             | 6.60 | 5.09      | 8.55  | <.0001  |
| Congenital malformations, deformations and chromosomal abnormalities | 48 200       | 17%                                    | 8 000                              | 5.53 | 3.07      | 9.99  | <.0001  |
| Symptoms/signs and abnormal clinical and laboratory findings n.e.c   | 124 700      | 24%                                    | 29 500                             | 4.71 | 3.29      | 6.76  | <.0001  |
| Certain infectious and parasitic diseases                            | 28 200       | 24%                                    | 6 800                              | 4.66 | 2.36      | 9.17  | <.0001  |
| Mental and behavioural disorders                                     | 621 800      | 27%                                    | 164 900                            | 4.60 | 1.04      | 20.35 | 0.0441  |
| Diseases of the respiratory system                                   | 127 900      | 27%                                    | 34 200                             | 4.49 | 3.24      | 6.23  | <.0001  |
| Other injury/poisoning                                               | 65 900       | 23%                                    | 14 900                             | 4.17 | 2.63      | 6.62  | <.0001  |
| Injury/accident                                                      | 434 700      | 17%                                    | 74 900                             | 3.85 | 3.11      | 4.77  | <.0001  |
| Diseases of the blood and blood forming organs                       | 17 200       | 22%                                    | 3 700                              | 3.72 | 1.53      | 9.00  | 0.0036  |
| Back problems                                                        | 1 128 200    | 19%                                    | 210 100                            | 3.49 | 3.01      | 4.04  | <.0001  |
| Diseases of the skin and subcutaneous tissues                        | 65 700       | 15%                                    | 9 900                              | 3.41 | 2.06      | 5.65  | <.0001  |
| Other diseases of the musculoskeletal system and connective tissue   | 251 600      | 22%                                    | 56 300                             | 3.35 | 2.59      | 4.33  | <.0001  |
| Arthritis and related disorders                                      | 902 200      | 23%                                    | 207 200                            | 3.27 | 2.79      | 3.83  | <.0001  |
| Heart Disease                                                        | 225 100      | 23%                                    | 52 300                             | 3.24 | 2.47      | 4.26  | <.0001  |

|                                                     |         |     |        |      |      |      |        |
|-----------------------------------------------------|---------|-----|--------|------|------|------|--------|
| Diseases of the eye and adnexa                      | 99 800  | 19% | 19 100 | 3.18 | 2.08 | 4.86 | <.0001 |
| Other diseases of the circulatory system            | 122 600 | 22% | 27 600 | 3.13 | 2.21 | 4.44 | <.0001 |
| Diabetes                                            | 271 100 | 19% | 51 700 | 2.99 | 2.31 | 3.87 | 0.0441 |
| Neoplasms (tumours/cancers)                         | 97 000  | 19% | 18 800 | 2.90 | 1.92 | 4.37 | <.0001 |
| Diseases of the ear and mastoid process             | 284 800 | 10% | 47 800 | 2.73 | 2.08 | 3.59 | <.0001 |
| Diseases of the nervous system                      | 491 800 | 13% | 65 500 | 2.67 | 2.14 | 3.32 | <.0001 |
| Diseases of the digestive system                    | 154 100 | 14% | 21 900 | 2.37 | 1.67 | 3.38 | <.0001 |
| Diseases of the genitourinary system                | 70 800  | 14% | 9 900  | 2.28 | 1.36 | 3.82 | 0.0018 |
| Asthma                                              | 925 200 | 8%  | 76 600 | 2.01 | 1.65 | 2.44 | <.0001 |
| Hypertension                                        | 604 200 | 14% | 83 200 | 1.84 | 1.50 | 2.26 | <.0001 |
| Other endocrine/nutritional and metabolic disorders | 87 300  | 10% | 8 500  | 1.55 | 0.92 | 2.62 | 0.1015 |
| Other                                               | 44 700  | 11% | 4 812  | 1.48 | 0.71 | 3.10 | 0.2993 |
| Deafness/hearing loss                               | 153 300 | 8%  | 12 975 | 1.22 | 0.77 | 1.94 | 0.3938 |
| High cholesterol                                    | 92 900  | 6%  | 5 211  | 0.77 | 0.43 | 1.39 | 0.3794 |

**Table 3: Multidimensional poverty status of those with varying long term health conditions, after equivalising income for the cost of disability in adults, 2003**

| Long term health condition                                           | Proportion in multidimensional poverty | Number in multidimensional poverty | OR    | 95% CI    |       | p-value |
|----------------------------------------------------------------------|----------------------------------------|------------------------------------|-------|-----------|-------|---------|
| No condition                                                         | 4%                                     | 440 500                            |       | REFERENCE |       |         |
| Mental and behavioural disorders                                     | 36%                                    | 220 900                            | 13.83 | 11.76     | 16.26 | <.0001  |
| Depression/mood affective disorders                                  | 34%                                    | 71 600                             | 9.86  | 7.72      | 12.61 | <.0001  |
| Congenital malformations, deformations and chromosomal abnormalities | 23%                                    | 10 900                             | 9.82  | 5.70      | 16.92 | <.0001  |
| Certain infectious and parasitic diseases                            | 38%                                    | 10 900                             | 9.58  | 5.20      | 17.64 | <.0001  |
| Diseases of the respiratory system                                   | 43%                                    | 55 100                             | 9.13  | 6.75      | 12.35 | <.0001  |
| Other injury/poisoning                                               | 35%                                    | 23 000                             | 7.84  | 5.25      | 11.71 | <.0001  |
| Other diseases of the circulatory system                             | 41%                                    | 49 800                             | 7.00  | 5.18      | 9.47  | <.0001  |
| Symptoms/signs and abnormal clinical and laboratory findings n.e.c   | 31%                                    | 38 400                             | 6.97  | 4.93      | 9.85  | <.0001  |
| Diseases of the blood and blood forming organs                       | 33%                                    | 5 700                              | 6.94  | 3.40      | 14.17 | <.0001  |
| Diseases of the skin and subcutaneous tissues                        | 24%                                    | 15 700                             | 6.69  | 4.35      | 10.30 | <.0001  |
| Other diseases of the musculoskeletal system and connective tissue   | 36%                                    | 91 400                             | 6.48  | 5.17      | 8.13  | <.0001  |
| Diseases of the eye and adnexa                                       | 31%                                    | 31 300                             | 6.19  | 4.22      | 9.08  | <.0001  |
| Injury/accident                                                      | 23%                                    | 102 000                            | 6.07  | 5.00      | 7.37  | <.0001  |
| Back problems                                                        | 27%                                    | 305 400                            | 5.80  | 5.08      | 6.63  | <.0001  |
| Arthritis and related disorders                                      | 35%                                    | 316 300                            | 5.63  | 4.88      | 6.50  | <.0001  |
| Heart Disease                                                        | 36%                                    | 80 600                             | 5.53  | 4.35      | 7.05  | <.0001  |
| Neoplasms (tumours/cancers)                                          | 32%                                    | 31 200                             | 5.52  | 3.90      | 7.83  | <.0001  |
| Diseases of the nervous                                              | 20%                                    | 100 300                            | 4.77  | 3.94      | 5.78  | <.0001  |

|                                                     |     |         |      |      |      |        |
|-----------------------------------------------------|-----|---------|------|------|------|--------|
| system                                              |     |         |      |      |      |        |
| Diabetes                                            | 26% | 70 600  | 4.31 | 3.42 | 5.45 | <.0001 |
| Diseases of the ear and mastoid process             | 24% | 68 500  | 4.23 | 3.32 | 5.39 | <.0001 |
| Other                                               | 26% | 11 600  | 4.22 | 2.45 | 7.26 | <.0001 |
| Diseases of the digestive system                    | 22% | 34 400  | 4.14 | 3.07 | 5.60 | <.0001 |
| Diseases of the genitourinary system                | 22% | 15 400  | 3.92 | 2.52 | 6.09 | <.0001 |
| Asthma                                              | 11% | 104 400 | 3.18 | 2.67 | 3.79 | <.0001 |
| Hypertension                                        | 18% | 110 000 | 2.42 | 2.01 | 2.92 | <.0001 |
| Other endocrine/nutritional and metabolic disorders | 13% | 11 600  | 2.24 | 1.40 | 3.56 | 0.0007 |
| Deafness/hearing loss                               | 15% | 22 300  | 2.13 | 1.46 | 3.08 | <.0001 |
| High cholesterol                                    | 8%  | 7 000   | 1.01 | 0.59 | 1.74 | 0.9623 |

1  
2  
3  
4  
5  
6  
7  
8  
9  
10  
11  
12  
13  
14  
15  
16  
17  
18  
19  
20  
21  
22  
23  
24  
25  
26  
27  
28  
29  
30  
31  
32  
33  
34  
35  
36  
37  
38  
39  
40  
41  
42  
43  
44  
45  
46  
47  
48  
49  
50  
51  
52  
53  
54  
55  
56  
57  
58  
59  
60

Figure 1: Components of the 'freedom poverty measure'

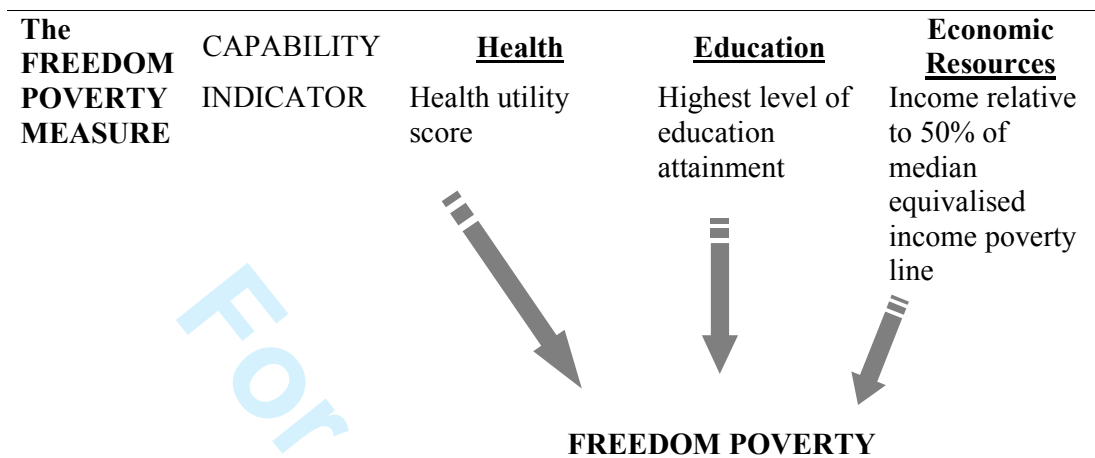

For peer review only



**Chronic health conditions and poverty: a cross-sectional study using a multidimensional poverty measure**

|                                 |                                                                                                                                                                                                                          |
|---------------------------------|--------------------------------------------------------------------------------------------------------------------------------------------------------------------------------------------------------------------------|
| Journal:                        | <i>BMJ Open</i>                                                                                                                                                                                                          |
| Manuscript ID:                  | bmjopen-2013-003397.R1                                                                                                                                                                                                   |
| Article Type:                   | Research                                                                                                                                                                                                                 |
| Date Submitted by the Author:   | 03-Sep-2013                                                                                                                                                                                                              |
| Complete List of Authors:       | Callander, Emily; University of Sydney, NHMRC Clinical Trials Centre<br>Schofield, Deborah; University of Sydney, NHMRC Clinical Trials Centre<br>Shrestha, Rupendra; University of Sydney, NHMRC Clinical Trials Centre |
| <b>Primary Subject Heading</b>: | Health economics                                                                                                                                                                                                         |
| Secondary Subject Heading:      | Health policy, Public health, Sociology                                                                                                                                                                                  |
| Keywords:                       | HEALTH ECONOMICS, PUBLIC HEALTH, Health policy < HEALTH SERVICES ADMINISTRATION & MANAGEMENT                                                                                                                             |
|                                 |                                                                                                                                                                                                                          |

SCHOLARONE™  
Manuscripts

## Chronic health conditions and poverty: a cross-sectional study using a multidimensional poverty measure

### ABSTRACT

#### Objectives

To identify the chronic health conditions associated with multidimensional poverty.

#### Design

Cross-sectional study of the nationally representative *Survey of Disability, Ageing and Carers*, conducted by the Australian Bureau of Statistics.

#### Setting

Australian population in 2003

#### Participants

35,704 individuals randomly selected from the Australian population by the Australian Bureau of Statistics.

#### Outcome measures

Multidimensional poverty status, costs of disability, SF-6D health utility score, income, education attainment.

#### Results

Amongst those who were multidimensionally poor, 75% had a chronic health condition and the most common health conditions were back problems (11% of those in multidimensional poverty had back problems), and arthritis (11%). The conditions with the highest proportion of individuals in multidimensional poverty were depression/mood affecting disorders (26% in



1  
2  
3 multidimensional poverty) and mental and behavioural disorders (22%). Those with  
4  
5 depression/mood affecting disorders were nearly 7 times (OR 6.60, 95% CI: 5.09 – 8.55,  
6  
7  $p < .0001$ ) more likely to be multidimensionally poor than those with no health condition.  
8  
9 Equivalising for the additional costs of disability increased the proportion of individuals in  
10  
11 multidimensional poverty for all conditions and the conditions with the highest proportion of  
12  
13 individuals in multidimensional poverty changed.  
14

## 15 16 17 **Conclusions**

18  
19 Due to the influence of certain health conditions on poverty status, health interventions have  
20  
21 the potential to improve national living standards and poverty rates in a similar way that  
22  
23 ‘traditional’ policy responses such as changes to welfare payment currently do. Using a  
24  
25 multidimensional poverty measure reveals the health conditions that should be the focus of  
26  
27 such efforts.  
28  
29  
30  
31  
32  
33  
34  
35  
36  
37  
38  
39  
40  
41  
42  
43  
44  
45  
46  
47  
48  
49  
50  
51  
52  
53  
54  
55  
56  
57  
58  
59  
60

## Article Summary

### *Article Focus*

- Multidimensional poverty status of people with various chronic health conditions
- The influence of costs of disability on multidimensional poverty status

### *Key messages*

- Amongst those who were multidimensionally poor the most commonly reported health conditions were back problems, and arthritis
- Those with depression were nearly 7 times more likely to be multidimensionally poor than those with no health condition
- Equivalising for the additional costs of disability changed the conditions with the highest proportion of individuals in multidimensional poverty

### *Strengths and limitations*

- Uses Australia's first measure of multidimensional poverty
- Takes into consideration education attainment and overall health status (measured by the SF-6D) as well as income when assessing people's poverty status

## INTRODUCTION

Standard of living is a broad concept that loosely relates to the overall life of an individual, and the quality of that life. Poverty studies seek to measure an individual's living standards, with those who have a 'poor' standard of living being seen as living in poverty (1, 2).

Traditionally, poverty has been measured based upon an individual's available income; however, it is now accepted that income gives too narrow a view of an individual's overall living standards and other indicators of living standards are needed (3, 4). The capabilities theory of Sen has been at the forefront of the movement away from the uni-dimensional income approach to poverty measurement, with Sen defining poverty as a lack of freedom due to "the deprivation of basic capabilities" (5). Capabilities are resources, attributes or circumstances that give an individual the capacity to adequately function and engage with the society they live in, and the ability to do things an individual values (5). This shift in conceptualising poverty and living standards has given rise to the now-widespread use of multidimensional poverty measures (6-10). These measures still seek to measure living standards and identify those living in poverty, however they use multiple indicators not just income.

Overall health status imparts a massive impact upon an individual's living standards by directly influencing what physical and mental functioning they can undertake, and is often seen as a basic capability (5, 11-14). Furthermore, health status affects living standards indirectly through limiting education and financial resources: poor health status may reduce the ability to undertake education (15-17), and may also limit economic resources through restricting employment (18-21). For a detailed discussion of how health acts as a key capability and determinant of living standards see (22).

1  
2  
3 In recognition of the importance of good health for adequate living standards, health status  
4 has been included as a key component in numerous measures of poverty (9, 23-25), including  
5 the Freedom Poverty Measure within Australia (22). The Freedom Poverty Measure, a  
6 multidimensional measure of poverty, sees overall health status and education attainment as  
7 impacting upon living standards in a similar way that low income does (22). Under the  
8 Freedom Poverty Measure overall health status, in part, determines poverty status: those in  
9 multidimensional poverty<sup>1</sup> have a low income and either poor overall health status or an  
10 insufficient level of education attainment.  
11  
12  
13  
14  
15  
16  
17  
18  
19

20  
21 Including health in a measure of poverty provides the opportunity for cross-portfolio  
22 responses to improving the living standards of disadvantaged members of society – with  
23 health being seen as key contributor to low living standards, health interventions have the  
24 potential to be a direct policy response to improving living standards alongside existing  
25 measures such as reform to social security arrangements (26). However, different chronic  
26 health conditions are likely to have varying impacts upon living standards, with some  
27 conditions more severely affecting living standards than others<sup>2</sup>. This paper will look at the  
28 relationship between multidimensional poverty, measured using the Freedom Poverty  
29 Measure, and specific chronic health conditions in the Australian population to determine  
30 which chronic health conditions have the largest impact upon living standards and as such  
31 their prevention or treatment should be targeted as a cross-portfolio concern.  
32  
33  
34  
35  
36  
37  
38  
39  
40  
41  
42  
43  
44  
45  
46  
47  
48  
49  
50

---

51 <sup>1</sup> The use of both income measures of poverty and multidimensional measures of poverty in the literature  
52 creates the need to clarify which measure is being used. Hence people may be labelled as being in 'income  
53 poverty' or in 'multidimensional poverty' depending on which measure was used – both refer to a state of low  
54 living standards. The term 'freedom poverty' refers to those who are identified as being in multidimensional  
55 poverty using the Freedom Poverty Measure.

56 <sup>2</sup> Within this paper a chronic health condition refers to a specific ailment that has lasted, or is likely to last, for  
57 six months or more.  
58  
59  
60

## METHODS

### *Data source*

The 2003 Survey of Disability, Ageing and Carers (SDAC) provided the data source for this paper. The SDAC provided detailed self-reported data on socio-demographic status, labour force participation, health and disability status, chronic health conditions, and economic information on individuals and their families<sup>3</sup> (30).

The 2003 SDAC is a comprehensive, nationally representative survey conducted by the Australian Bureau of Statistics (ABS) between 23 June 2003 to 1 November 2003 (27). Both private dwellings and care-accommodation establishments were included in the sample, with a response rate of 89% for private dwellings and 92% for care-accommodation establishments (28). The survey covered individuals in all states and territories, including both rural and urban populations – however, those in very remote areas were excluded. As these areas make up only 1% of the population, the ABS deemed that this would not affect the robustness of the data (29) The original 2003 SDAC data was weighted by the Australian Bureau of Statistics (ABS) to represent the Australian population in 2003 by broad population variables such as age and sex.

### *Identifying those in freedom poverty*

In order to determine how various health conditions impact upon living standards the Freedom Poverty Measure was utilised to identify those in multidimensional poverty. The Freedom Poverty Measure combines measures of low income, poor health, and insufficient education. The Freedom Poverty Measure was designed specifically for the Australian

---

<sup>3</sup> At the time of writing this paper the 2003 SDAC was the most current dataset that contains detailed and accurate income, health and education information on the one survey.

1  
2  
3 population in a manner that is consistent with international poverty measurement practices

4  
5 (7). For more detailed information on the Freedom Poverty Measure and other examples of  
6  
7 its application see (10, 18, 22, 31).  
8  
9

10 The income, health and education status of individuals was initially identified, as follows:

- 11  
12  
13 - If an individual's family income (measured by the income unit income (29)) was  
14 below the 50% of the median income poverty line then they were considered to have  
15 low income.  
16  
17  
18 - If an individual had a poorer health utility score (measured by the Short Form 6D (SF-  
19 6D) measure (32)) than the average for their age group they were considered to have  
20 poor overall health status.  
21  
22  
23 - If an individual had a highest level of education attainment lower than year 12 (for  
24 those aged 25 to 64 years), or lower than Year 10 (for those aged 65 years and over)  
25 they were considered to have an insufficient level of education attainment.  
26  
27  
28  
29  
30  
31  
32  
33

34 Those with low income AND either poor overall health status or an insufficient level of  
35 education attainment were considered to be in 'freedom poverty' and to be  
36 multidimensionally poor.  
37  
38  
39  
40

#### 41 ***Identifying chronic health conditions***

42  
43  
44 The 2003 SDAC recorded any chronic health conditions, defined as health conditions that  
45 had lasted or were likely to last for six months or more, experienced by respondents. If an  
46 individual recorded multiple health conditions then their main chronic health condition was  
47 also recorded. The ABS classified respondent's chronic health conditions according to the  
48 ICD-10 health coding system. Lists of what ICD-10 codes correspond with different chronic  
49 health condition groups can be found in (30). Respondents with Alzheimer's disease and  
50  
51  
52  
53  
54  
55  
56  
57  
58  
59  
60

1  
2  
3 'certain conditions originating in the perinatal period' were excluded because of their low  
4  
5 numbers (less than 10 respondents) on the SDAC.  
6  
7

### 8 *Statistical Analysis*

9

10  
11 Initially descriptive statistics were utilised to look at the proportion of people in  
12  
13 multidimensional poverty with a long term health condition, the most common conditions  
14  
15 experienced by those in multidimensional poverty, and the proportion of people with various  
16  
17 conditions in multidimensional poverty.  
18  
19

20  
21 Following this logistic regression models were utilised to look at the odds ratio of being in  
22  
23 multidimensional poverty for those with various chronic health conditions. Those with no  
24  
25 chronic health conditions were used as the reference group, and the models were adjusted for  
26  
27 age and sex.  
28  
29

### 30 *Sensitivity Analysis – costs of disability*

31

32  
33  
34 Ill health can further impact on living standards by imparting additional costs upon  
35  
36 individuals, including the costs of treatment, support services, and medication, and it has  
37  
38 been argued that these costs should be taken into consideration when comparing incomes  
39  
40 (33). Those with chronic health conditions are likely to need higher incomes to obtain the  
41  
42 same level of living standards as those with no chronic health conditions due to the additional  
43  
44 costs of living for those with ill health. There is a small amount of literature that has  
45  
46 developed a possible means of taking these costs into consideration. Internationally this has  
47  
48 been undertaken by Zaidi and Burchardt (33), and within Australia this has been undertaken  
49  
50 by Saunders (34).  
51  
52  
53  
54  
55  
56  
57  
58  
59  
60

1  
2  
3 Using the methods developed by Saunders to measure the costs associated with disability, a  
4  
5 sensitivity analysis was undertaken to look at the difference in the number of people in  
6  
7 multidimensional poverty as a result of accounting for the extra costs of disability. The long  
8  
9 term health conditions associated with multidimensional poverty when the additional costs of  
10  
11 disability in adults were taken into consideration was also examined. It is acknowledged by  
12  
13 the authors that there is a number of limitations to this approach, including the exclusion of  
14  
15 children in the methods developed by Saunders and also possible limitations in the use of  
16  
17 disability classification to estimate the costs of health (35). However, this sensitivity will still  
18  
19 provide an example of how taking into consideration the costs of disability will affect the  
20  
21 financial situation of individuals and hence the numbers in multidimensional poverty.  
22  
23  
24

## 25 26 **RESULTS**

27  
28  
29 There were 35 704 respondents in the SDAC, and of these 3 469 were in multidimensional  
30  
31 poverty. Once weighted these data represented 19 320 000 individuals in the 2003 Australian  
32  
33 population in private households, of which 1 857 000 were multidimensionally poor (10%).  
34  
35 Of the Australian population in 2003, 40% identified having a long term health condition.  
36  
37

38  
39 Not all individuals with a chronic health condition had poor overall health status, with 74% of  
40  
41 individuals with a chronic health condition having good overall health status, indicating that  
42  
43 their health condition had only a mild impact on their overall health status. Table 1 shows the  
44  
45 overall health status of those with various chronic health conditions. Conditions with a  
46  
47 relatively low proportion of individuals reporting poor overall health status included high  
48  
49 cholesterol, hypertension and asthma.  
50  
51

52  
53 Amongst those who were multidimensionally poor, 75% identified having a chronic health  
54  
55 condition. Of those with a chronic health condition, 18% were in multidimensional poverty;  
56  
57



1  
2  
3 whereas for those with no chronic health condition 4% were in multidimensional poverty  
4  
5 (Table 2). Those with a long term health condition were 3 times more likely to be in  
6  
7 multidimensional poverty than those with no health condition, after controlling for age and  
8  
9 sex (OR 3.38, 95% CI: 3.06 – 3.76,  $p < .0001$ ).

10  
11  
12 Amongst those in multidimensional poverty the most common health conditions were back  
13  
14 problems (11% of those in multidimensional poverty had back problems), arthritis and related  
15  
16 disorders (11%), followed by mental and behavioural disorders (9%), hypertension (4%),  
17  
18 asthma (4%) and injury/accident (4%). Amongst the individual health conditions, the  
19  
20 condition with the highest proportion in multidimensional poverty was depression/mood  
21  
22 affecting disorders (26% were in multidimensional poverty), mental and behavioural  
23  
24 disorders (22% were in multidimensional poverty), certain infectious and parasitic diseases  
25  
26 (22% were in multidimensional poverty), and diseases of the respiratory system (22% were in  
27  
28 multidimensional poverty) (Table 3).

29  
30  
31 After controlling for age and sex there was no significant difference in the likelihood of being  
32  
33 in multidimensional poverty between those with no chronic health condition and those with  
34  
35 high cholesterol ( $p=0.3794$ ), deafness/noise induced hearing loss ( $p=0.3938$ ), and conditions  
36  
37 grouped by the ABS into ‘other 2003 codes which had no ICD–10 equivalent’ ( $p=0.2993$ ).

38  
39  
40 Those with depression/mood affecting disorders were nearly 7 times (OR 6.60, 95% CI: 5.09  
41  
42 – 8.55,  $p < .0001$ ) more likely to be in multidimensional poverty than those with no chronic  
43  
44 health condition. The odds of being in multidimensional poverty for other chronic health  
45  
46 conditions, compared to those with no health condition are shown in Table 3.  
47  
48  
49  
50  
51  
52  
53  
54  
55  
56  
57  
58  
59  
60

### *Costs of disability*

Before equivalising income for disability status there were 1 875 000 individuals in multidimensional poverty. After equivalising family income for the costs of disability in adults there were 2 462 000 individuals in multidimensional poverty. After equivalising income for the costs of disability in adults, 82% of people in multidimensional poverty identified having a chronic health condition – an increase of 8 percentage points. Of those with a chronic health condition, 27% were in multidimensional poverty; whereas for those with no chronic health condition 5% were in multidimensional poverty after equivalising for the costs of disability. Those with a chronic health condition were now more than 5 times more likely to be in multidimensional poverty than those with no chronic health condition, after controlling for age and sex (OR 5.57, 95% CI: 5.07 – 6.12,  $p < .0001$ ).

After equivalising for the costs of disability in adults, the most common chronic health conditions amongst those in multidimensional poverty were still arthritis and related disorders (13%), back problems (12%), mental and behavioural disorders (9%), hypertension (5%) and asthma (4%). The conditions with the highest proportion of individuals in multidimensional poverty were diseases of the respiratory system (43% were in multidimensional poverty) and other diseases of the circulatory system (41% were in multidimensional poverty). The proportion of individuals in multidimensional poverty in each of these conditions increased after taking into consideration the costs of disability in adults when equivalising income, and the conditions with the highest proportion of individuals in multidimensional poverty also changed (Table 4).

After controlling for age and sex, those with mental and behavioural disorders were nearly 14 times more likely to be in multidimensional poverty than those with no health condition after

1  
2  
3 equivalising income for disability in adults (OR 13.83, 95% CI: 11.76 – 16.26,  $p < .0001$ ). All  
4  
5 chronic health conditions with the exception of high cholesterol ( $p = 0.9623$ ) were  
6  
7 significantly more likely to be in multidimensional poverty than those with no chronic health  
8  
9 condition (Table 4).  
10

## 11 12 13 **DISCUSSION**

14  
15  
16 The results have shown that those with a chronic health condition were significantly more  
17  
18 likely to be in multidimensional poverty than those without a chronic health condition, with  
19  
20 18% of those with a chronic health condition being in multidimensional poverty, compared to  
21  
22 only 4% of those without a chronic health condition. Of those in multidimensional poverty,  
23  
24 74% had a long term health condition.  
25  
26

27  
28 The results of the sensitivity analysis show that after equivalising income for adult disability,  
29  
30 there was a 3 percentage point increase in the proportion of the population in  
31  
32 multidimensional poverty, and a 9 percentage point increase in the proportion of individuals  
33  
34 with a chronic health condition in multidimensional poverty. However, there is opportunity to  
35  
36 improve the methods by which the costs of ill health are produced by including children in  
37  
38 the methodology and having further consideration as to how health is measured. In spite of  
39  
40 this, the sensitivity analysis has shown the additional burden chronic health conditions can  
41  
42 have upon living standards – through the economic burden placed upon families as a result of  
43  
44 disability.  
45  
46  
47

48  
49 Chronic health conditions impact upon living standards in a number of ways. Having a  
50  
51 chronic health condition results in an increased likelihood of being out of the labour force  
52  
53 (19), with recent Australian studies showing that being out of the labour force is associated  
54  
55 with low incomes and high rates of income poverty (36, 37). Furthermore, having a chronic  
56  
57  
58  
59  
60

1  
2  
3 health condition is likely to affect an individual's overall health status – however, as this  
4  
5 study has shown, different chronic health conditions have varying impacts upon overall  
6  
7 health status, with some chronic health conditions such as hypertension or asthma having few  
8  
9 people reporting poor overall health status.  
10

11  
12 The chronic health conditions most commonly associated with multidimensional poverty  
13  
14 were arthritis and related disorders, back problems and mental and behavioural disorders – all  
15  
16 of which have been shown to be preventable. There are numerous interventions for each of  
17  
18 these conditions that have been shown to be cost-effective in either preventing the onset of  
19  
20 the condition or reducing the severity of the condition (38-41). When considering the  
21  
22 additional costs of low living standards the further benefits of such intervention programs  
23  
24 become more apparent.  
25  
26  
27  
28

29 Using mental and behavioural problems as an example, the benefit of interventions such as  
30  
31 those deemed to be cost effective in Mihalopoulos *et. al.* (42) could not only be listed as  
32  
33 improvements in health status and the associated savings to health care systems, but also the  
34  
35 added benefits of reducing of the number of people in multidimensional poverty. Improving  
36  
37 the health of individuals with mental and behavioural problems could potentially result in  
38  
39 27% of these individuals no longer being multidimensionally poor and amongst the most  
40  
41 disadvantaged members of society. Furthermore, improving health status may also increase  
42  
43 employment opportunities, with around one quarter of those with mental and behavioural  
44  
45 problems being out of the labour force due to their ill health (43), which is likely to in turn  
46  
47 improve the financial situation of individuals with mental health problems further improving  
48  
49 their living standards. As such, health interventions should be incorporated into policy  
50  
51 responses to improve national living standards.  
52  
53  
54  
55  
56  
57  
58  
59  
60

1  
2  
3 Political rhetoric is currently shifting to advocate the use of cross-portfolio responses to  
4 social issues (44). As such, there is opportunity for health interventions to be taken up in  
5 government departments other than those traditionally responsible for health care, and be  
6 included alongside other efforts to improve living standards such as education and skills  
7 reform, and social security reform. Using the Freedom Poverty Measure reveals the chronic  
8 health conditions that are experienced by the most disadvantaged people in society and  
9 should be the focus of political efforts to improve living standards.  
10  
11  
12  
13  
14  
15  
16  
17  
18

#### 19 FUNDING SOURCE

20  
21  
22 This study was funded partly by an National Health and Medical Research Council  
23 (NHMRC) Doctoral Scholarship and an NHMRC Early Career Fellowship.  
24  
25  
26  
27  
28  
29  
30  
31  
32  
33  
34  
35  
36  
37  
38  
39  
40  
41  
42  
43  
44  
45  
46  
47  
48  
49  
50  
51  
52  
53  
54  
55  
56  
57  
58  
59  
60

**REFERENCES**

1. Greenwell H, Lloyd R, Harding A. An introduction to poverty measurement issues. Canberra: National Centre for Social and Economic Modelling (NATSEM)2001.
2. Townsend P. Poverty in the United Kingdom. Harmondsworth: Penguin; 1979.
3. Travers P, Richardson S. Living Decently: Material well-being in Australia. Melbourne: Oxford University Press; 1993.
4. Stiglitz J, Sen A, Fitoussi J. Report by the Commission on the Measurement of Economic Performance and Social Progress. Paris: Commission on the Measurement of Economic Performance and Social Progress2009.
5. Sen AK. Development as Freedom. Oxford: Oxford University Press; 1999.
6. Alkire S, Santos M. A Multidimensional Approach: Poverty Measurement & Beyond. Social Indicators Research. 2013;112(2):239-57.
7. Alkire S, Foster JE. Counting and multidimensional poverty measurement. Journal of Public Economics. 2011;95(7-8):476-87.
8. United Nations Development Programme. Human Development Report 2008. New York: United Nations2008.
9. United Nations Development Programme. Multidimensional Poverty Index. New York: United Nations Development Programme; 2010 [cited 2011 21 May]; Available from: <http://hdr.undp.org/en/statistics/mpi/>.
10. Callander E, Schofield D, Shrestha R. Multi-dimensional poverty in Australia and the barriers ill health imposes on the employment of the disadvantaged. Journal of Socio Economics. 2011;40:736-42.
11. Council of Australian Governments. Human Capital Reform. Canberra: Council of Australian Governments; 2006.
12. Council of Australian Governments. Council of Australian Governments Meeting 10 February 2006 Communique.

1  
2  
3 [http://www.alga.asn.au/newsroom/communiques/01.coag/COAG\\_Communique\\_20060210.pdf](http://www.alga.asn.au/newsroom/communiques/01.coag/COAG_Communique_20060210.pdf):  
4  
5 COAG2006.  
6

- 7 13. Sen AK. Human capital and human capability. *World Development*. 1997;25(12):1959-61.  
8  
9  
10 14. Sen AK. *Public Health, ethics and equity*. Oxford: Oxford University Press; 2004.  
11  
12 15. Mushkin SJ. Health as an investment. *The Journal of Political Economy*. 1962;70(5):129-57.  
13  
14  
15 16. Laplagne P, Glover M, Shomos A. *Effects of health and education on labour force*  
16 *participation*. Canberra: Productivity Commission2007.  
17  
18  
19 17. Australian Bureau of Statistics. *Australian Social Trends*, March 2011. Canberra: ABS2011.  
20  
21  
22 18. Callander E, Schofield D, Shrestha R. Capacity for freedom - a new way of measuring poverty  
23 *amongst Australian children*. *Child Indicators Research*. 2012;5(1):179-98.  
24  
25  
26 19. Schofield D, Shrestha R, Passey M, Earnest A, Fletcher S. *Chronic disease and labour force*  
27 *participation among older Australians*. *Medical Journal of Australia*. 2008;189(8):447-50.  
28  
29  
30 20. Nepal B, Payne A, Brown L. *Healthy, wealthy and wise? The relationship between health,*  
31 *employment and earnings in Australia*. Sydney: AMP2009.  
32  
33  
34 21. Schofield D, Kelly S, Shrestha R, Callander E, Passey M, Percival R. *Long term financial*  
35 *impacts of CVD: Living standards in retirement*. *International Journal of Cardiology*. 2010;155(3):406-  
36 08.  
37  
38  
39 22. Callander E, Schofield D, Shrestha R. *Towards a holistic understanding of poverty: a new*  
40 *multidimensional measure of poverty for Australia*. *Health Sociology Review*. 2012;21(2):138-52.  
41  
42  
43 23. Lugo MA. *Comparing Multidimensional Indices of Inequality: methods and application*.  
44 *Research on Economic Inequality*. 2007;14:213-36.  
45  
46  
47 24. Nilsson T. *Measuring Changes in Multidimensional Inequality-An Empirical Application*2007.  
48  
49  
50 25. Noble M, McLennan D, Wilkinson K, Whitworth A, Exley S, Barnes H, et al. *The English indices*  
51 *of deprivation 2010*. London: Department of Communities and Local Government2010.  
52  
53  
54  
55  
56  
57  
58  
59  
60

- 1  
2  
3 26. Swan W. Budget Speech 2011-12. Online: [http://www.budget.gov.au/2011-](http://www.budget.gov.au/2011-12/content/speech/html/speech.htm)  
4 [12/content/speech/html/speech.htm](http://www.budget.gov.au/2011-12/content/speech/html/speech.htm): Australian Government; 2011.  
5  
6  
7 27. Australian Bureau of Statistics. Disability, ageing and carers, Australia: Users guide  
8 4431.0.55.001. Canberra: ABS; 2004.  
9  
10  
11 28. Australian Bureau of Statistics. Information Paper - Disability, Ageing and Carers, Australia:  
12 User Guide ABS 4431.0.55.001. Canberra: ABS; 2003.  
13  
14  
15 29. Australian Bureau of Statistics. Information Paper - Basic Confidentialised Unit Record File:  
16 Survey of Disability, Ageing and Carers 2003 (reissue) Canberra: ABS2005.  
17  
18  
19  
20 30. Australian Bureau of Statistics. Information Paper - Basic Confidentialised Unit Record File:  
21 Survey of Disability, Ageing and Carers 2003 (reissue) Canberra: ABS2004.  
22  
23  
24 31. Callander E, Schofield D, Shrestha R. Freedom poverty: A new tool to identify the multiple  
25 disadvantages affecting those with CVD. *International Journal of Cardiology*. 2013;166(2):321-6.  
26  
27  
28 32. Brazier JE, Roberts J. The Estimation of a Preference-Based Measure of Health From the SF-  
29 12. *Medical Care*. 2004;42:851-9.  
30  
31  
32 33. Zaidi A, Burchardt T. Comparing incomes when needs differ: Equivalization for the extra  
33 costs of disability in the U.K. *Review of Income and Wealth*. 2005;51(1):89-114.  
34  
35  
36 34. Saunders P. The costs of disability and the incidence of poverty. Sydney: Social Policy  
37 Research Centre (SPRC), University of New South Wales2006.  
38  
39  
40 35. Mont D. Measuring Disability Prevalence, SP Discussion Paper. New York: The World  
41 Bank2007.  
42  
43  
44 36. Schofield D, Shrestha R, Percival R, Passey M, Kelly S, Callander E. Economic Impacts of  
45 Illness in Older Workers: Quantifying the impact of illness on income, tax revenue and government  
46 spending. *BMC Public Health*. 2011;11(418).  
47  
48  
49 37. Schofield DJ, Callander EJ, Shrestha RN, Percival R, Kelly SJ, Passey ME. Premature  
50 retirement due to ill health and income poverty: a cross-sectional study of older workers. *BMJ Open*.  
51 2013;3(5).  
52  
53  
54  
55  
56  
57  
58  
59  
60



- 1  
2  
3 38. Vos T, Carter R, Barendregt JJ, Mihalopoulos C, Veerman L, Magnus A, et al. Assessing Cost-  
4 Effectiveness in Prevention (ACE Prevention): Final Report. Brisbane and Melbourne: University of  
5 Queensland and Deakin University 2010.  
6  
7  
8  
9 39. Puolakka K, Kautiainen H, Mottonen T, Hannonen P, Korpela M, Julkunen H, et al. Impact of  
10 initial aggressive drug treatment with a combination of disease-modifying antirheumatic drugs on  
11 the development of work disability in early rheumatoid arthritis: a five-year randomized followup  
12 trial. *Arthritis Rheum.* 2004 Jan;50(1):55-62.  
13  
14  
15  
16 40. Linton SJ, van Tulder MW. Preventive Interventions for Back and Neck Pain Problems: What  
17 is the Evidence? *Spine.* 2001;26(7):778-87.  
18  
19  
20  
21 41. Barretta B, Byford S, Knappa M. Evidence of cost-effective treatments for depression: a  
22 systematic review. *Journal of Affective Disorders* 2005;84:1-13.  
23  
24  
25 42. Mihalopoulos C, Vos T, Pirkis J, Carter R. The Economic Analysis of Prevention in Mental  
26 Health Programs. *Annual Review of Clinical Psychology.* 2011;7:169-201.  
27  
28  
29 43. Schofield D, Shrestha R, Percival R, Kelly S, Passey M, Callander E. Quantifying the effect of  
30 early retirement on the wealth of individuals with depression or other mental illness. *British Journal*  
31 *of Psychiatry.* 2011;198:123-8.  
32  
33  
34  
35 44. Social Inclusion Unit. The Australian Public Service Social Inclusion policy design and delivery  
36 toolkit In: Department of the Prime Minister and Cabinet, editor. Canberra 2009.  
37  
38  
39  
40  
41  
42  
43  
44  
45  
46  
47  
48  
49  
50  
51  
52  
53  
54  
55  
56  
57  
58  
59  
60

**Table 1: Overall health status of those with different chronic health conditions**

| <b>Long term health condition</b>                                    | <b>Proportion with poor overall health status, measured by SF-6D</b> |
|----------------------------------------------------------------------|----------------------------------------------------------------------|
| Depression/ mood affective disorders                                 | 22%                                                                  |
| Congenital malformations, deformations and chromosomal abnormalities | 49%                                                                  |
| Symptoms/signs and abnormal clinical and laboratory findings n.e.c   | 36%                                                                  |
| Certain infectious and parasitic diseases                            | 41%                                                                  |
| Mental and behavioural disorders                                     | 46%                                                                  |
| Diseases of the respiratory system                                   | 42%                                                                  |
| Other injury/poisoning                                               | 40%                                                                  |
| Injury/accident                                                      | 25%                                                                  |
| Diseases of the blood and blood forming organs                       | 52%                                                                  |
| Back problems                                                        | 32%                                                                  |
| Diseases of the skin and subcutaneous tissues                        | 28%                                                                  |
| Other diseases of the musculoskeletal system and connective tissue   | 40%                                                                  |
| Arthritis and related disorders                                      | 31%                                                                  |
| Heart Disease                                                        | 33%                                                                  |
| Diseases of the eye and adnexa                                       | 33%                                                                  |
| Other diseases of the circulatory system                             | 43%                                                                  |
| Diabetes                                                             | 12%                                                                  |
| Neoplasms (tumours/cancers)                                          | 33%                                                                  |
| Diseases of the ear and mastoid process                              | 23%                                                                  |
| Diseases of the nervous system                                       | 27%                                                                  |
| Diseases of the digestive system                                     | 17%                                                                  |
| Diseases of the genitourinary system                                 | 17%                                                                  |
| Asthma                                                               | 10%                                                                  |
| Hypertension                                                         | 5%                                                                   |
| Other endocrine/nutritional and metabolic disorders                  | 11%                                                                  |
| Other                                                                | 32%                                                                  |
| Deafness/hearing loss                                                | 15%                                                                  |
| High cholesterol                                                     | 2%                                                                   |

**Table 2: Number of individuals in multidimensional poverty by health status, 2003**

|                                            | <b>In Multidimensional Poverty</b> | <b>Not in Multidimensional Poverty</b> |
|--------------------------------------------|------------------------------------|----------------------------------------|
| Has a long term health condition           | 1 387 000                          | 6 371 000                              |
| Does not have a long term health condition | 449 000                            | 11 113 000                             |

For peer review only

**Table 3: Multidimensional poverty status of those with varying long term health conditions, 2003**

| Long term health condition                                           | Total number | Proportion in multidimensional poverty | Number in multidimensional poverty | OR   | 95% CI    |       | p-value |
|----------------------------------------------------------------------|--------------|----------------------------------------|------------------------------------|------|-----------|-------|---------|
| No condition                                                         | 11 562 200   | 4%                                     | 488 700                            |      | REFERENCE |       |         |
| Depression/ mood affective disorders                                 | 208 400      | 28%                                    | 57 300                             | 6.60 | 5.09      | 8.55  | <.0001  |
| Congenital malformations, deformations and chromosomal abnormalities | 48 200       | 17%                                    | 8 000                              | 5.53 | 3.07      | 9.99  | <.0001  |
| Symptoms/signs and abnormal clinical and laboratory findings n.e.c   | 124 700      | 24%                                    | 29 500                             | 4.71 | 3.29      | 6.76  | <.0001  |
| Certain infectious and parasitic diseases                            | 28 200       | 24%                                    | 6 800                              | 4.66 | 2.36      | 9.17  | <.0001  |
| Mental and behavioural disorders                                     | 621 800      | 27%                                    | 164 900                            | 4.60 | 1.04      | 20.35 | 0.0441  |
| Diseases of the respiratory system                                   | 127 900      | 27%                                    | 34 200                             | 4.49 | 3.24      | 6.23  | <.0001  |
| Other injury/poisoning                                               | 65 900       | 23%                                    | 14 900                             | 4.17 | 2.63      | 6.62  | <.0001  |
| Injury/accident                                                      | 434 700      | 17%                                    | 74 900                             | 3.85 | 3.11      | 4.77  | <.0001  |
| Diseases of the blood and blood forming organs                       | 17 200       | 22%                                    | 3 700                              | 3.72 | 1.53      | 9.00  | 0.0036  |
| Back problems                                                        | 1 128 200    | 19%                                    | 210 100                            | 3.49 | 3.01      | 4.04  | <.0001  |
| Diseases of the skin and subcutaneous tissues                        | 65 700       | 15%                                    | 9 900                              | 3.41 | 2.06      | 5.65  | <.0001  |
| Other diseases of the musculoskeletal system and connective tissue   | 251 600      | 22%                                    | 56 300                             | 3.35 | 2.59      | 4.33  | <.0001  |
| Arthritis and related disorders                                      | 902 200      | 23%                                    | 207 200                            | 3.27 | 2.79      | 3.83  | <.0001  |
| Heart Disease                                                        | 225 100      | 23%                                    | 52 300                             | 3.24 | 2.47      | 4.26  | <.0001  |
| Diseases of the eye and adnexa                                       | 99 800       | 19%                                    | 19 100                             | 3.18 | 2.08      | 4.86  | <.0001  |
| Other diseases of the                                                | 122 600      | 22%                                    | 27 600                             | 3.13 | 2.21      | 4.44  | <.0001  |

|                                                              |         |     |        |      |      |      |        |
|--------------------------------------------------------------|---------|-----|--------|------|------|------|--------|
| circulatory system                                           |         |     |        |      |      |      |        |
| Diabetes                                                     | 271 100 | 19% | 51 700 | 2.99 | 2.31 | 3.87 | 0.0441 |
| Neoplasms<br>(tumours/cancers)                               | 97 000  | 19% | 18 800 | 2.90 | 1.92 | 4.37 | <.0001 |
| Diseases of the ear<br>and mastoid process                   | 284 800 | 10% | 47 800 | 2.73 | 2.08 | 3.59 | <.0001 |
| Diseases of the<br>nervous system                            | 491 800 | 13% | 65 500 | 2.67 | 2.14 | 3.32 | <.0001 |
| Diseases of the<br>digestive system                          | 154 100 | 14% | 21 900 | 2.37 | 1.67 | 3.38 | <.0001 |
| Diseases of the<br>genitourinary system                      | 70 800  | 14% | 9 900  | 2.28 | 1.36 | 3.82 | 0.0018 |
| Asthma                                                       | 925 200 | 8%  | 76 600 | 2.01 | 1.65 | 2.44 | <.0001 |
| Hypertension                                                 | 604 200 | 14% | 83 200 | 1.84 | 1.50 | 2.26 | <.0001 |
| Other<br>endocrine/nutritional<br>and metabolic<br>disorders | 87 300  | 10% | 8 500  | 1.55 | 0.92 | 2.62 | 0.1015 |
| Other                                                        | 44 700  | 11% | 4 812  | 1.48 | 0.71 | 3.10 | 0.2993 |
| Deafness/hearing<br>loss                                     | 153 300 | 8%  | 12 975 | 1.22 | 0.77 | 1.94 | 0.3938 |
| High cholesterol                                             | 92 900  | 6%  | 5 211  | 0.77 | 0.43 | 1.39 | 0.3794 |

**Table 4: Multidimensional poverty status of those with varying long term health conditions, after equivalising income for the cost of disability in adults, 2003**

| <b>Long term health condition</b>                                    | <b>Proportion in multidimensional poverty</b> | <b>Number in multidimensional poverty</b> | <b>OR</b> | <b>95% CI</b> |       | <b>p-value</b> |
|----------------------------------------------------------------------|-----------------------------------------------|-------------------------------------------|-----------|---------------|-------|----------------|
| No condition                                                         | 4%                                            | 440 500                                   |           | REFERENCE     |       |                |
| Mental and behavioural disorders                                     | 36%                                           | 220 900                                   | 13.83     | 11.76         | 16.26 | <.0001         |
| Depression/mood affective disorders                                  | 34%                                           | 71 600                                    | 9.86      | 7.72          | 12.61 | <.0001         |
| Congenital malformations, deformations and chromosomal abnormalities | 23%                                           | 10 900                                    | 9.82      | 5.70          | 16.92 | <.0001         |
| Certain infectious and parasitic diseases                            | 38%                                           | 10 900                                    | 9.58      | 5.20          | 17.64 | <.0001         |
| Diseases of the respiratory system                                   | 43%                                           | 55 100                                    | 9.13      | 6.75          | 12.35 | <.0001         |
| Other injury/poisoning                                               | 35%                                           | 23 000                                    | 7.84      | 5.25          | 11.71 | <.0001         |
| Other diseases of the circulatory system                             | 41%                                           | 49 800                                    | 7.00      | 5.18          | 9.47  | <.0001         |
| Symptoms/signs and abnormal clinical and laboratory findings n.e.c   | 31%                                           | 38 400                                    | 6.97      | 4.93          | 9.85  | <.0001         |
| Diseases of the blood and blood forming organs                       | 33%                                           | 5 700                                     | 6.94      | 3.40          | 14.17 | <.0001         |
| Diseases of the skin and subcutaneous tissues                        | 24%                                           | 15 700                                    | 6.69      | 4.35          | 10.30 | <.0001         |
| Other diseases of the musculoskeletal system and connective tissue   | 36%                                           | 91 400                                    | 6.48      | 5.17          | 8.13  | <.0001         |
| Diseases of the eye and adnexa                                       | 31%                                           | 31 300                                    | 6.19      | 4.22          | 9.08  | <.0001         |
| Injury/accident                                                      | 23%                                           | 102 000                                   | 6.07      | 5.00          | 7.37  | <.0001         |
| Back problems                                                        | 27%                                           | 305 400                                   | 5.80      | 5.08          | 6.63  | <.0001         |
| Arthritis and related disorders                                      | 35%                                           | 316 300                                   | 5.63      | 4.88          | 6.50  | <.0001         |
| Heart Disease                                                        | 36%                                           | 80 600                                    | 5.53      | 4.35          | 7.05  | <.0001         |
| Neoplasms (tumours/cancers)                                          | 32%                                           | 31 200                                    | 5.52      | 3.90          | 7.83  | <.0001         |
| Diseases of the nervous system                                       | 20%                                           | 100 300                                   | 4.77      | 3.94          | 5.78  | <.0001         |
| Diabetes                                                             | 26%                                           | 70 600                                    | 4.31      | 3.42          | 5.45  | <.0001         |
| Diseases of the ear and                                              | 24%                                           | 68 500                                    | 4.23      | 3.32          | 5.39  | <.0001         |

|                                                     |     |         |      |      |      |        |
|-----------------------------------------------------|-----|---------|------|------|------|--------|
| mastoid process                                     |     |         |      |      |      |        |
| Other                                               | 26% | 11 600  | 4.22 | 2.45 | 7.26 | <.0001 |
| Diseases of the digestive system                    | 22% | 34 400  | 4.14 | 3.07 | 5.60 | <.0001 |
| Diseases of the genitourinary system                | 22% | 15 400  | 3.92 | 2.52 | 6.09 | <.0001 |
| Asthma                                              | 11% | 104 400 | 3.18 | 2.67 | 3.79 | <.0001 |
| Hypertension                                        | 18% | 110 000 | 2.42 | 2.01 | 2.92 | <.0001 |
| Other endocrine/nutritional and metabolic disorders | 13% | 11 600  | 2.24 | 1.40 | 3.56 | 0.0007 |
| Deafness/hearing loss                               | 15% | 22 300  | 2.13 | 1.46 | 3.08 | <.0001 |
| High cholesterol                                    | 8%  | 7 000   | 1.01 | 0.59 | 1.74 | 0.9623 |

## Chronic health conditions and poverty: a cross-sectional study using a multidimensional poverty measure

### ABSTRACT

#### Objectives

To identify the chronic health conditions associated with multidimensional poverty.

#### Design

Cross-sectional study of the nationally representative *Survey of Disability, Ageing and Carers*, conducted by the Australian Bureau of Statistics.

#### Setting

Australian population in 2003

#### Participants

35,704 individuals randomly selected from the Australian population by the Australian Bureau of Statistics.

#### Outcome measures

Multidimensional poverty status, costs of disability, SF-6D health utility score, income, education attainment.

#### Results

Amongst those who were multidimensionally poor, 75% had a chronic health condition and the most common health conditions were back problems (11% of those in multidimensional poverty had back problems), and arthritis (11%). The conditions with the highest proportion of individuals in multidimensional poverty were depression/mood affecting disorders (26% in



1  
2  
3 multidimensional poverty) and mental and behavioural disorders (22%). Those with  
4  
5 depression/mood affecting disorders were nearly 7 times (OR 6.60, 95% CI: 5.09 – 8.55,  
6  
7  $p < .0001$ ) more likely to be multidimensionally poor than those with no health condition.  
8  
9 Equivalising for the additional costs of disability increased the proportion of individuals in  
10  
11 multidimensional poverty for all conditions and the conditions with the highest proportion of  
12  
13 individuals in multidimensional poverty changed.  
14

## 15 16 17 **Conclusions**

18  
19 Due to the influence of certain health conditions on poverty status, health interventions have  
20  
21 the potential to improve national living standards and poverty rates in a similar way that  
22  
23 ‘traditional’ policy responses such as changes to welfare payment currently do. Using a  
24  
25 multidimensional poverty measure reveals the health conditions that should be the focus of  
26  
27 such efforts.  
28  
29  
30  
31  
32  
33  
34  
35  
36  
37  
38  
39  
40  
41  
42  
43  
44  
45  
46  
47  
48  
49  
50  
51  
52  
53  
54  
55  
56  
57  
58  
59  
60

## Article Summary

### *Article Focus*

- Multidimensional poverty status of people with various chronic health conditions
- The influence of costs of disability on multidimensional poverty status

### *Key messages*

- Amongst those who were multidimensionally poor the most commonly reported health conditions were back problems, and arthritis
- Those with depression were nearly 7 times more likely to be multidimensionally poor than those with no health condition
- Equivalising for the additional costs of disability changed the conditions with the highest proportion of individuals in multidimensional poverty

### *Strengths and limitations*

- Uses Australia's first measure of multidimensional poverty
- Takes into consideration education attainment and overall health status (measured by the SF-6D) as well as income when assessing people's poverty status

## INTRODUCTION

Standard of living is a broad concept that loosely relates to the overall life of an individual, and the quality of that life. Poverty studies seek to measure an individual's living standards, with those who have a 'poor' standard of living being seen as living in poverty (1, 2).

Traditionally, poverty has been measured based upon an individual's available income; however, it is now accepted that income gives too narrow a view of an individual's overall living standards and other indicators of living standards are needed (3, 4). The capabilities theory of Sen has been at the forefront of the movement away from the uni-dimensional income approach to poverty measurement, with Sen defining poverty as a lack of freedom due to "the deprivation of basic capabilities" (5). Capabilities are resources, attributes or circumstances that give an individual the capacity to adequately function and engage with the society they live in, and the ability to do things an individual values (5). This shift in conceptualising poverty and living standards has given rise to the now-widespread use of multidimensional poverty measures (6-10). These measures still seek to measure living standards and identify those living in poverty, however they use multiple indicators not just income.

Overall health status imparts a massive impact upon an individual's living standards by directly influencing what physical and mental functioning they can undertake, and is often seen as a basic capability (5, 11-14). Furthermore, health status affects living standards indirectly through limiting education and financial resources: poor health status may reduce the ability to undertake education (15-17), and may also limit economic resources through restricting employment (18-21). For a detailed discussion of how health acts as a key capability and determinant of living standards see (22).

1  
2  
3 In recognition of the importance of good health for adequate living standards, **health status**  
4 **has been included as a key component in numerous measures of poverty (9, 23-25), including**  
5 **the Freedom Poverty Measure within Australia (22).** The Freedom Poverty Measure, a  
6  
7 multidimensional measure of poverty, sees **overall health status** and education attainment as  
8  
9 impacting upon living standards in a similar way that low income does (22). Under the  
10  
11 Freedom Poverty Measure **overall health status**, in part, determines poverty status: those in  
12  
13 **multidimensional poverty<sup>1</sup> have a low income and either poor overall health status or an**  
14  
15 **insufficient level of education attainment.**  
16  
17  
18  
19

20  
21 Including health in a measure of poverty provides the opportunity for cross-portfolio  
22  
23 responses to improving the living standards of disadvantaged members of society – with  
24  
25 health being seen as key contributor to low living standards, health interventions have the  
26  
27 potential to be a direct policy response to improving living standards alongside existing  
28  
29 measures such as reform to social security arrangements (26). However, different chronic  
30  
31 health conditions are likely to have varying impacts upon living standards, with some  
32  
33 conditions more severely affecting living standards than others<sup>2</sup>. This paper will look at the  
34  
35 relationship between multidimensional poverty, measured using the Freedom Poverty  
36  
37 Measure, and **specific chronic** health conditions in the Australian population to determine  
38  
39 which chronic health conditions have the largest impact upon living standards and as such  
40  
41 their prevention or treatment should be targeted as a cross-portfolio concern.  
42  
43  
44  
45  
46  
47  
48  
49  
50

---

51 <sup>1</sup> The use of both income measures of poverty and multidimensional measures of poverty in the literature  
52 creates the need to clarify which measure is being used. Hence people may be labelled as being in 'income  
53 poverty' or in 'multidimensional poverty' depending on which measure was used – both refer to a state of low  
54 living standards. The term 'freedom poverty' refers to those who are identified as being in multidimensional  
55 poverty using the Freedom Poverty Measure.

56 <sup>2</sup> Within this paper a chronic health condition refers to a specific ailment that has lasted, or is likely to last, for  
57 six months or more.

## METHODS

### *Data source*

The 2003 Survey of Disability, Ageing and Carers (SDAC) provided the data source for this paper. The SDAC provided detailed self-reported data on socio-demographic status, labour force participation, health and disability status, chronic health conditions, and economic information on individuals and their families<sup>3</sup> (30).

The 2003 SDAC is a comprehensive, nationally representative survey conducted by the Australian Bureau of Statistics (ABS) between 23 June 2003 to 1 November 2003 (27). Both private dwellings and care-accommodation establishments were included in the sample, with a response rate of 89% for private dwellings and 92% for care-accommodation establishments (28). The survey covered individuals in all states and territories, including both rural and urban populations – however, those in very remote areas were excluded. As these areas make up only 1% of the population, the ABS deemed that this would not affect the robustness of the data (29) The original 2003 SDAC data was weighted by the Australian Bureau of Statistics (ABS) to represent the Australian population in 2003 by broad population variables such as age and sex.

### *Identifying those in freedom poverty*

In order to determine how various health conditions impact upon living standards the Freedom Poverty Measure was utilised to identify those in multidimensional poverty. The Freedom Poverty Measure combines measures of low income, poor health, and insufficient education. The Freedom Poverty Measure was designed specifically for the Australian

---

<sup>3</sup> At the time of writing this paper the 2003 SDAC was the most current dataset that contains detailed and accurate income, health and education information on the one survey.

1  
2  
3 population in a manner that is consistent with international poverty measurement practices

4  
5 (7). For more detailed information on the Freedom Poverty Measure and other examples of  
6  
7 its application see (10, 18, 22, 31).  
8  
9

10 **The income, health and education status of individuals was initially identified, as follows:**

- 11  
12  
13  
14 - If an individual's family income (measured by the income unit income (29)) was  
15 below the 50% of the median income poverty line then they were considered to have  
16 low income.  
17  
18  
19 - If an individual had a poorer health utility score (measured by the **Short Form 6D (SF-**  
20 **6D)** measure (32)) than the average for their age group they were considered to have  
21 **poor overall health status.**  
22  
23  
24 - If an individual had a highest level of education attainment lower than year 12 (for  
25 those aged 25 to 64 years), or lower than Year 10 (for those aged 65 years and over)  
26 they were considered to have an insufficient level of education attainment.  
27  
28  
29  
30  
31  
32  
33

34 **Those with low income AND either poor overall health status or an insufficient level of**  
35 **education attainment were considered to be in 'freedom poverty' and to be**  
36 **multidimensionally poor.**  
37  
38  
39  
40

#### 41 ***Identifying chronic health conditions***

42  
43  
44  
45 **The 2003 SDAC recorded any chronic health conditions, defined as health conditions that**  
46 **had lasted or were likely to last for six months or more, experienced by respondents. If an**  
47 **individual recorded multiple health conditions then their main chronic health condition was**  
48 **also recorded. The ABS classified respondent's chronic health conditions according to the**  
49 **ICD-10 health coding system. Lists of what ICD-10 codes correspond with different chronic**  
50 **health condition groups can be found in (30). Respondents with Alzheimer's disease and**  
51  
52  
53  
54  
55  
56  
57  
58  
59  
60

1  
2  
3 'certain conditions originating in the perinatal period' were excluded because of their low  
4  
5 numbers (less than 10 respondents) on the SDAC.  
6  
7

### 8 *Statistical Analysis*

9  
10  
11 Initially descriptive statistics were utilised to look at the proportion of people in  
12  
13 multidimensional poverty with a long term health condition, the most common conditions  
14  
15 experienced by those in multidimensional poverty, and the proportion of people with various  
16  
17 conditions in multidimensional poverty.  
18  
19

20  
21 Following this logistic regression models were utilised to look at the odds ratio of being in  
22  
23 multidimensional poverty for those with various chronic health conditions. Those with no  
24  
25 chronic health conditions were used as the reference group, and the models were adjusted for  
26  
27 age and sex.  
28  
29

### 30 *Sensitivity Analysis – costs of disability*

31  
32  
33 Ill health can further impact on living standards by imparting additional costs upon  
34  
35 individuals, including the costs of treatment, support services, and medication, and it has  
36  
37 been argued that these costs should be taken into consideration when comparing incomes  
38  
39 (33). Those with chronic health conditions are likely to need higher incomes to obtain the  
40  
41 same level of living standards as those with no chronic health conditions due to the additional  
42  
43 costs of living for those with ill health. There is a small amount of literature that has  
44  
45 developed a possible means of taking these costs into consideration. Internationally this has  
46  
47 been undertaken by Zaidi and Burchardt (33), and within Australia this has been undertaken  
48  
49 by Saunders (34).  
50  
51  
52  
53  
54  
55  
56  
57  
58  
59  
60

1  
2  
3 Using the methods developed by Saunders to measure the costs associated with disability, a  
4  
5 sensitivity analysis was undertaken to look at the difference in the number of people in  
6  
7 multidimensional poverty as a result of accounting for the extra costs of disability. The long  
8  
9 term health conditions associated with multidimensional poverty when the additional costs of  
10  
11 disability in adults were taken into consideration was also examined. It is acknowledged by  
12  
13 the authors that there is a number of limitations to this approach, including the exclusion of  
14  
15 children in the methods developed by Saunders and also possible limitations in the use of  
16  
17 disability classification to estimate the costs of health (35). However, this sensitivity will still  
18  
19 provide an example of how taking into consideration the costs of disability will affect the  
20  
21 financial situation of individuals and hence the numbers in multidimensional poverty.  
22  
23  
24

## 25 26 RESULTS

27  
28  
29 There were 35 704 respondents in the SDAC, and of these 3 469 were in multidimensional  
30  
31 poverty. Once weighted these data represented 19 320 000 individuals in the 2003 Australian  
32  
33 population in private households, of which 1 857 000 were multidimensionally poor (10%).  
34  
35 Of the Australian population in 2003, 40% identified having a long term health condition.  
36  
37

38  
39 **Not all individuals with a chronic health condition had poor overall health status, with 74% of**  
40  
41 **individuals with a chronic health condition having good overall health status, indicating that**  
42  
43 **their health condition had only a mild impact on their overall health status. Table 1 shows the**  
44  
45 **overall health status of those with various chronic health conditions. Conditions with a**  
46  
47 **relatively low proportion of individuals reporting poor overall health status included high**  
48  
49 **cholesterol, hypertension and asthma.**  
50  
51

52  
53 Amongst those who were multidimensionally poor, 75% identified having a chronic health  
54  
55 condition. Of those with a chronic health condition, 18% were in multidimensional poverty;  
56  
57



1  
2  
3 whereas for those with no chronic health condition 4% were in multidimensional poverty  
4  
5 (Table 2). Those with a long term health condition were 3 times more likely to be in  
6  
7 multidimensional poverty than those with no health condition, after controlling for age and  
8  
9 sex (OR 3.38, 95% CI: 3.06 – 3.76,  $p < .0001$ ).

10  
11  
12 Amongst those in multidimensional poverty the most common health conditions were back  
13  
14 problems (11% of those in multidimensional poverty had back problems), arthritis and related  
15  
16 disorders (11%), followed by mental and behavioural disorders (9%), hypertension (4%),  
17  
18 asthma (4%) and injury/accident (4%). Amongst the individual health conditions, the  
19  
20 condition with the highest proportion in multidimensional poverty was depression/mood  
21  
22 affecting disorders (26% were in multidimensional poverty), mental and behavioural  
23  
24 disorders (22% were in multidimensional poverty), certain infectious and parasitic diseases  
25  
26 (22% were in multidimensional poverty), and diseases of the respiratory system (22% were in  
27  
28 multidimensional poverty) (Table 3).

29  
30  
31 After controlling for age and sex there was no significant difference in the likelihood of being  
32  
33 in multidimensional poverty between those with no chronic health condition and those with  
34  
35 high cholesterol ( $p=0.3794$ ), deafness/noise induced hearing loss ( $p=0.3938$ ), and conditions  
36  
37 grouped by the ABS into ‘other 2003 codes which had no ICD–10 equivalent’ ( $p=0.2993$ ).

38  
39  
40 Those with depression/mood affecting disorders were nearly 7 times (OR 6.60, 95% CI: 5.09  
41  
42 – 8.55,  $p < .0001$ ) more likely to be in multidimensional poverty than those with no chronic  
43  
44 health condition. The odds of being in multidimensional poverty for other chronic health  
45  
46 conditions, compared to those with no health condition are shown in Table 3.  
47  
48  
49  
50  
51  
52  
53  
54  
55  
56  
57  
58  
59  
60

### *Costs of disability*

Before equivalising income for disability status there were 1 875 000 individuals in multidimensional poverty. After equivalising family income for the costs of disability in adults there were 2 462 000 individuals in multidimensional poverty. After equivalising income for the costs of disability in adults, 82% of people in multidimensional poverty identified having a chronic health condition – an increase of 8 percentage points. Of those with a chronic health condition, 27% were in multidimensional poverty; whereas for those with no chronic health condition 5% were in multidimensional poverty after equivalising for the costs of disability. Those with a chronic health condition were now more than 5 times more likely to be in multidimensional poverty than those with no chronic health condition, after controlling for age and sex (OR 5.57, 95% CI: 5.07 – 6.12,  $p < .0001$ ).

After equivalising for the costs of disability in adults, the most common chronic health conditions amongst those in multidimensional poverty were still arthritis and related disorders (13%), back problems (12%), mental and behavioural disorders (9%), hypertension (5%) and asthma (4%). The conditions with the highest proportion of individuals in multidimensional poverty were diseases of the respiratory system (43% were in multidimensional poverty) and other diseases of the circulatory system (41% were in multidimensional poverty). The proportion of individuals in multidimensional poverty in each of these conditions increased after taking into consideration the costs of disability in adults when equivalising income, and the conditions with the highest proportion of individuals in multidimensional poverty also changed (Table 4).

After controlling for age and sex, those with mental and behavioural disorders were nearly 14 times more likely to be in multidimensional poverty than those with no health condition after

1  
2  
3 equivalising income for disability in adults (OR 13.83, 95% CI: 11.76 – 16.26,  $p < .0001$ ). All  
4  
5 chronic health conditions with the exception of high cholesterol ( $p = 0.9623$ ) were  
6  
7 significantly more likely to be in multidimensional poverty than those with no chronic health  
8  
9 condition (Table 4).  
10

## 11 12 13 **DISCUSSION**

14  
15  
16 The results have shown that those with a chronic health condition were significantly more  
17  
18 likely to be in multidimensional poverty than those without a chronic health condition, with  
19  
20 18% of those with a chronic health condition being in multidimensional poverty, compared to  
21  
22 only 4% of those without a chronic health condition. Of those in multidimensional poverty,  
23  
24 74% had a long term health condition.  
25  
26

27  
28 The results of the sensitivity analysis show that after equivalising income for adult disability,  
29  
30 there was a 3 percentage point increase in the proportion of the population in  
31  
32 multidimensional poverty, and a 9 percentage point increase in the proportion of individuals  
33  
34 with a chronic health condition in multidimensional poverty. However, there is opportunity to  
35  
36 improve the methods by which the costs of ill health are produced by including children in  
37  
38 the methodology and having further consideration as to how health is measured. In spite of  
39  
40 this, the sensitivity analysis has shown the additional burden chronic health conditions can  
41  
42 have upon living standards – through the economic burden placed upon families as a result of  
43  
44 disability.  
45  
46  
47

48  
49 **Chronic health conditions impact upon living standards in a number of ways. Having a**  
50  
51 **chronic health condition results in an increased likelihood of being out of the labour force**  
52  
53 **(19), with recent Australian studies showing that being out of the labour force is associated**  
54  
55 **with low incomes and high rates of income poverty (36, 37). Furthermore, having a chronic**  
56  
57

1  
2  
3 health condition is likely to affect an individual's overall health status – however, as this  
4  
5 study has shown, different chronic health conditions have varying impacts upon overall  
6  
7 health status, with some chronic health conditions such as hypertension or asthma having few  
8  
9 people reporting poor overall health status.  
10

11  
12 The chronic health conditions most commonly associated with multidimensional poverty  
13  
14 were arthritis and related disorders, back problems and mental and behavioural disorders – all  
15  
16 of which have been shown to be preventable. There are numerous interventions for each of  
17  
18 these conditions that have been shown to be cost-effective in either preventing the onset of  
19  
20 the condition or reducing the severity of the condition (38-41). When considering the  
21  
22 additional costs of low living standards the further benefits of such intervention programs  
23  
24 become more apparent.  
25  
26  
27

28  
29 Using mental and behavioural problems as an example, the benefit of interventions such as  
30  
31 those deemed to be cost effective in Mihalopoulos *et. al.* (42) could not only be listed as  
32  
33 improvements in health status and the associated savings to health care systems, but also the  
34  
35 added benefits of reducing of the number of people in multidimensional poverty. Improving  
36  
37 the health of individuals with mental and behavioural problems could potentially result in  
38  
39 27% of these individuals no longer being multidimensionally poor and amongst the most  
40  
41 disadvantaged members of society. Furthermore, improving health status may also increase  
42  
43 employment opportunities, with around one quarter of those with mental and behavioural  
44  
45 problems being out of the labour force due to their ill health (43), which is likely to in turn  
46  
47 improve the financial situation of individuals with mental health problems further improving  
48  
49 their living standards. As such, health interventions should be incorporated into policy  
50  
51 responses to improve national living standards.  
52  
53  
54  
55  
56  
57  
58  
59  
60

1  
2  
3 Political rhetoric is currently shifting to advocate the use of cross-portfolio responses to  
4 social issues (44). As such, there is opportunity for health interventions to be taken up in  
5 government departments other than those traditionally responsible for health care, and be  
6 included alongside other efforts to improve living standards such as education and skills  
7 reform, and social security reform. Using the Freedom Poverty Measure reveals the chronic  
8 health conditions that are experienced by the most disadvantaged people in society and  
9 should be the focus of political efforts to improve living standards.  
10  
11  
12  
13  
14  
15  
16  
17  
18  
19

#### 20 FUNDING SOURCE

21  
22 This study was funded partly by an National Health and Medical Research Council  
23 (NHMRC) Doctoral Scholarship and an NHMRC Early Career Fellowship.  
24  
25  
26  
27  
28  
29  
30  
31  
32  
33  
34  
35  
36  
37  
38  
39  
40  
41  
42  
43  
44  
45  
46  
47  
48  
49  
50  
51  
52  
53  
54  
55  
56  
57  
58  
59  
60

**REFERENCES**

1. Greenwell H, Lloyd R, Harding A. An introduction to poverty measurement issues. Canberra: National Centre for Social and Economic Modelling (NATSEM)2001.
2. Townsend P. Poverty in the United Kingdom. Harmondsworth: Penguin; 1979.
3. Travers P, Richardson S. Living Decently: Material well-being in Australia. Melbourne: Oxford University Press; 1993.
4. Stiglitz J, Sen A, Fitoussi J. Report by the Commission on the Measurement of Economic Performance and Social Progress. Paris: Commission on the Measurement of Economic Performance and Social Progress2009.
5. Sen AK. Development as Freedom. Oxford: Oxford University Press; 1999.
6. Alkire S, Santos M. A Multidimensional Approach: Poverty Measurement & Beyond. Social Indicators Research. 2013;112(2):239-57.
7. Alkire S, Foster JE. Counting and multidimensional poverty measurement. Journal of Public Economics. 2011;95(7-8):476-87.
8. United Nations Development Programme. Human Development Report 2008. New York: United Nations2008.
9. United Nations Development Programme. Multidimensional Poverty Index. New York: United Nations Development Programme; 2010 [cited 2011 21 May]; Available from: <http://hdr.undp.org/en/statistics/mpi/>.
10. Callander E, Schofield D, Shrestha R. Multi-dimensional poverty in Australia and the barriers ill health imposes on the employment of the disadvantaged. Journal of Socio Economics. 2011;40:736-42.
11. Council of Australian Governments. Human Capital Reform. Canberra: Council of Australian Governments; 2006.
12. Council of Australian Governments. Council of Australian Governments Meeting 10 February 2006 Communique.

1  
2  
3 [http://www.alga.asn.au/newsroom/communiques/01.coag/COAG\\_Communique\\_20060210.pdf](http://www.alga.asn.au/newsroom/communiques/01.coag/COAG_Communique_20060210.pdf):  
4  
5

6 COAG2006.

- 7 13. Sen AK. Human capital and human capability. *World Development*. 1997;25(12):1959-61.  
8  
9  
10 14. Sen AK. *Public Health, ethics and equity*. Oxford: Oxford University Press; 2004.  
11  
12 15. Mushkin SJ. Health as an investment. *The Journal of Political Economy*. 1962;70(5):129-57.  
13  
14  
15 16. Laplagne P, Glover M, Shomos A. *Effects of health and education on labour force*  
16 *participation*. Canberra: Productivity Commission2007.  
17  
18  
19 17. Australian Bureau of Statistics. *Australian Social Trends*, March 2011. Canberra: ABS2011.  
20  
21  
22 18. Callander E, Schofield D, Shrestha R. Capacity for freedom - a new way of measuring poverty  
23 *amongst Australian children*. *Child Indicators Research*. 2012;5(1):179-98.  
24  
25  
26 19. Schofield D, Shrestha R, Passey M, Earnest A, Fletcher S. *Chronic disease and labour force*  
27 *participation among older Australians*. *Medical Journal of Australia*. 2008;189(8):447-50.  
28  
29  
30 20. Nepal B, Payne A, Brown L. *Healthy, wealthy and wise? The relationship between health,*  
31 *employment and earnings in Australia*. Sydney: AMP2009.  
32  
33  
34 21. Schofield D, Kelly S, Shrestha R, Callander E, Passey M, Percival R. *Long term financial*  
35 *impacts of CVD: Living standards in retirement*. *International Journal of Cardiology*. 2010;155(3):406-  
36 08.  
37  
38  
39 22. Callander E, Schofield D, Shrestha R. *Towards a holistic understanding of poverty: a new*  
40 *multidimensional measure of poverty for Australia*. *Health Sociology Review*. 2012;21(2):138-52.  
41  
42  
43 23. Lugo MA. *Comparing Multidimensional Indices of Inequality: methods and application*.  
44 *Research on Economic Inequality*. 2007;14:213-36.  
45  
46  
47 24. Nilsson T. *Measuring Changes in Multidimensional Inequality-An Empirical Application*2007.  
48  
49  
50 25. Noble M, McLennan D, Wilkinson K, Whitworth A, Exley S, Barnes H, et al. *The English indices*  
51 *of deprivation 2010*. London: Department of Communities and Local Government2010.  
52  
53  
54  
55  
56  
57  
58  
59  
60

- 1  
2  
3 26. Swan W. Budget Speech 2011-12. Online: <http://www.budget.gov.au/2011-12/content/speech/html/speech.htm>; Australian Government; 2011.  
4  
5  
6  
7 27. Australian Bureau of Statistics. Disability, ageing and carers, Australia: Users guide  
8 4431.0.55.001. Canberra: ABS; 2004.  
9  
10  
11 28. Australian Bureau of Statistics. Information Paper - Disability, Ageing and Carers, Australia:  
12 User Guide ABS 4431.0.55.001. Canberra: ABS; 2003.  
13  
14  
15 29. Australian Bureau of Statistics. Information Paper - Basic Confidentialised Unit Record File:  
16 Survey of Disability, Ageing and Carers 2003 (reissue) Canberra: ABS2005.  
17  
18  
19  
20 30. Australian Bureau of Statistics. Information Paper - Basic Confidentialised Unit Record File:  
21 Survey of Disability, Ageing and Carers 2003 (reissue) Canberra: ABS2004.  
22  
23  
24 31. Callander E, Schofield D, Shrestha R. Freedom poverty: A new tool to identify the multiple  
25 disadvantages affecting those with CVD. *International Journal of Cardiology*. 2013;166(2):321-6.  
26  
27  
28 32. Brazier JE, Roberts J. The Estimation of a Preference-Based Measure of Health From the SF-  
29 12. *Medical Care*. 2004;42:851-9.  
30  
31  
32 33. Zaidi A, Burchardt T. Comparing incomes when needs differ: Equivalization for the extra  
33 costs of disability in the U.K. *Review of Income and Wealth*. 2005;51(1):89-114.  
34  
35  
36 34. Saunders P. The costs of disability and the incidence of poverty. Sydney: Social Policy  
37 Research Centre (SPRC), University of New South Wales2006.  
38  
39  
40 35. Mont D. Measuring Disability Prevalence, SP Discussion Paper. New York: The World  
41 Bank2007.  
42  
43  
44 36. Schofield D, Shrestha R, Percival R, Passey M, Kelly S, Callander E. Economic Impacts of  
45 Illness in Older Workers: Quantifying the impact of illness on income, tax revenue and government  
46 spending. *BMC Public Health*. 2011;11(418).  
47  
48  
49  
50 37. Schofield DJ, Callander EJ, Shrestha RN, Percival R, Kelly SJ, Passey ME. Premature  
51 retirement due to ill health and income poverty: a cross-sectional study of older workers. *BMJ Open*.  
52 2013;3(5).  
53  
54  
55  
56  
57  
58  
59  
60



- 1  
2  
3 38. Vos T, Carter R, Barendregt JJ, Mihalopoulos C, Veerman L, Magnus A, et al. Assessing Cost-  
4 Effectiveness in Prevention (ACE Prevention): Final Report. Brisbane and Melbourne: University of  
5 Queensland and Deakin University 2010.  
6  
7  
8  
9 39. Puolakka K, Kautiainen H, Mottonen T, Hannonen P, Korpela M, Julkunen H, et al. Impact of  
10 initial aggressive drug treatment with a combination of disease-modifying antirheumatic drugs on  
11 the development of work disability in early rheumatoid arthritis: a five-year randomized followup  
12 trial. *Arthritis Rheum.* 2004 Jan;50(1):55-62.  
13  
14  
15  
16 40. Linton SJ, van Tulder MW. Preventive Interventions for Back and Neck Pain Problems: What  
17 is the Evidence? *Spine.* 2001;26(7):778-87.  
18  
19  
20  
21 41. Barretta B, Byford S, Knappa M. Evidence of cost-effective treatments for depression: a  
22 systematic review. *Journal of Affective Disorders* 2005;84:1-13.  
23  
24  
25 42. Mihalopoulos C, Vos T, Pirkis J, Carter R. The Economic Analysis of Prevention in Mental  
26 Health Programs. *Annual Review of Clinical Psychology.* 2011;7:169-201.  
27  
28  
29 43. Schofield D, Shrestha R, Percival R, Kelly S, Passey M, Callander E. Quantifying the effect of  
30 early retirement on the wealth of individuals with depression or other mental illness. *British Journal*  
31 *of Psychiatry.* 2011;198:123-8.  
32  
33  
34  
35 44. Social Inclusion Unit. The Australian Public Service Social Inclusion policy design and delivery  
36 toolkit In: Department of the Prime Minister and Cabinet, editor. Canberra 2009.  
37  
38  
39  
40  
41  
42  
43  
44  
45  
46  
47  
48  
49  
50  
51  
52  
53  
54  
55  
56  
57  
58  
59  
60

**Table 1: Overall health status of those with different chronic health conditions**

| <b>Long term health condition</b>                                    | <b>Proportion with poor overall health status, measured by SF-6D</b> |
|----------------------------------------------------------------------|----------------------------------------------------------------------|
| Depression/ mood affective disorders                                 | 22%                                                                  |
| Congenital malformations, deformations and chromosomal abnormalities | 49%                                                                  |
| Symptoms/signs and abnormal clinical and laboratory findings n.e.c   | 36%                                                                  |
| Certain infectious and parasitic diseases                            | 41%                                                                  |
| Mental and behavioural disorders                                     | 46%                                                                  |
| Diseases of the respiratory system                                   | 42%                                                                  |
| Other injury/poisoning                                               | 40%                                                                  |
| Injury/accident                                                      | 25%                                                                  |
| Diseases of the blood and blood forming organs                       | 52%                                                                  |
| Back problems                                                        | 32%                                                                  |
| Diseases of the skin and subcutaneous tissues                        | 28%                                                                  |
| Other diseases of the musculoskeletal system and connective tissue   | 40%                                                                  |
| Arthritis and related disorders                                      | 31%                                                                  |
| Heart Disease                                                        | 33%                                                                  |
| Diseases of the eye and adnexa                                       | 33%                                                                  |
| Other diseases of the circulatory system                             | 43%                                                                  |
| Diabetes                                                             | 12%                                                                  |
| Neoplasms (tumours/cancers)                                          | 33%                                                                  |
| Diseases of the ear and mastoid process                              | 23%                                                                  |
| Diseases of the nervous system                                       | 27%                                                                  |
| Diseases of the digestive system                                     | 17%                                                                  |
| Diseases of the genitourinary system                                 | 17%                                                                  |
| Asthma                                                               | 10%                                                                  |
| Hypertension                                                         | 5%                                                                   |
| Other endocrine/nutritional and metabolic disorders                  | 11%                                                                  |
| Other                                                                | 32%                                                                  |
| Deafness/hearing loss                                                | 15%                                                                  |
| High cholesterol                                                     | 2%                                                                   |

**Table 2: Number of individuals in multidimensional poverty by health status, 2003**

|                                            | <b>In Multidimensional Poverty</b> | <b>Not in Multidimensional Poverty</b> |
|--------------------------------------------|------------------------------------|----------------------------------------|
| Has a long term health condition           | 1 387 000                          | 6 371 000                              |
| Does not have a long term health condition | 449 000                            | 11 113 000                             |

For peer review only

**Table 3: Multidimensional poverty status of those with varying long term health conditions, 2003**

| Long term health condition                                           | Total number | Proportion in multidimensional poverty | Number in multidimensional poverty | OR   | 95% CI    |       | p-value |
|----------------------------------------------------------------------|--------------|----------------------------------------|------------------------------------|------|-----------|-------|---------|
| No condition                                                         | 11 562 200   | 4%                                     | 488 700                            |      | REFERENCE |       |         |
| Depression/ mood affective disorders                                 | 208 400      | 28%                                    | 57 300                             | 6.60 | 5.09      | 8.55  | <.0001  |
| Congenital malformations, deformations and chromosomal abnormalities | 48 200       | 17%                                    | 8 000                              | 5.53 | 3.07      | 9.99  | <.0001  |
| Symptoms/signs and abnormal clinical and laboratory findings n.e.c   | 124 700      | 24%                                    | 29 500                             | 4.71 | 3.29      | 6.76  | <.0001  |
| Certain infectious and parasitic diseases                            | 28 200       | 24%                                    | 6 800                              | 4.66 | 2.36      | 9.17  | <.0001  |
| Mental and behavioural disorders                                     | 621 800      | 27%                                    | 164 900                            | 4.60 | 1.04      | 20.35 | 0.0441  |
| Diseases of the respiratory system                                   | 127 900      | 27%                                    | 34 200                             | 4.49 | 3.24      | 6.23  | <.0001  |
| Other injury/poisoning                                               | 65 900       | 23%                                    | 14 900                             | 4.17 | 2.63      | 6.62  | <.0001  |
| Injury/accident                                                      | 434 700      | 17%                                    | 74 900                             | 3.85 | 3.11      | 4.77  | <.0001  |
| Diseases of the blood and blood forming organs                       | 17 200       | 22%                                    | 3 700                              | 3.72 | 1.53      | 9.00  | 0.0036  |
| Back problems                                                        | 1 128 200    | 19%                                    | 210 100                            | 3.49 | 3.01      | 4.04  | <.0001  |
| Diseases of the skin and subcutaneous tissues                        | 65 700       | 15%                                    | 9 900                              | 3.41 | 2.06      | 5.65  | <.0001  |
| Other diseases of the musculoskeletal system and connective tissue   | 251 600      | 22%                                    | 56 300                             | 3.35 | 2.59      | 4.33  | <.0001  |
| Arthritis and related disorders                                      | 902 200      | 23%                                    | 207 200                            | 3.27 | 2.79      | 3.83  | <.0001  |
| Heart Disease                                                        | 225 100      | 23%                                    | 52 300                             | 3.24 | 2.47      | 4.26  | <.0001  |
| Diseases of the eye and adnexa                                       | 99 800       | 19%                                    | 19 100                             | 3.18 | 2.08      | 4.86  | <.0001  |
| Other diseases of the                                                | 122 600      | 22%                                    | 27 600                             | 3.13 | 2.21      | 4.44  | <.0001  |

|                                                              |         |     |        |      |      |      |        |
|--------------------------------------------------------------|---------|-----|--------|------|------|------|--------|
| circulatory system                                           |         |     |        |      |      |      |        |
| Diabetes                                                     | 271 100 | 19% | 51 700 | 2.99 | 2.31 | 3.87 | 0.0441 |
| Neoplasms<br>(tumours/cancers)                               | 97 000  | 19% | 18 800 | 2.90 | 1.92 | 4.37 | <.0001 |
| Diseases of the ear<br>and mastoid process                   | 284 800 | 10% | 47 800 | 2.73 | 2.08 | 3.59 | <.0001 |
| Diseases of the<br>nervous system                            | 491 800 | 13% | 65 500 | 2.67 | 2.14 | 3.32 | <.0001 |
| Diseases of the<br>digestive system                          | 154 100 | 14% | 21 900 | 2.37 | 1.67 | 3.38 | <.0001 |
| Diseases of the<br>genitourinary system                      | 70 800  | 14% | 9 900  | 2.28 | 1.36 | 3.82 | 0.0018 |
| Asthma                                                       | 925 200 | 8%  | 76 600 | 2.01 | 1.65 | 2.44 | <.0001 |
| Hypertension                                                 | 604 200 | 14% | 83 200 | 1.84 | 1.50 | 2.26 | <.0001 |
| Other<br>endocrine/nutritional<br>and metabolic<br>disorders | 87 300  | 10% | 8 500  | 1.55 | 0.92 | 2.62 | 0.1015 |
| Other                                                        | 44 700  | 11% | 4 812  | 1.48 | 0.71 | 3.10 | 0.2993 |
| Deafness/hearing<br>loss                                     | 153 300 | 8%  | 12 975 | 1.22 | 0.77 | 1.94 | 0.3938 |
| High cholesterol                                             | 92 900  | 6%  | 5 211  | 0.77 | 0.43 | 1.39 | 0.3794 |

**Table 4: Multidimensional poverty status of those with varying long term health conditions, after equivalising income for the cost of disability in adults, 2003**

| <b>Long term health condition</b>                                    | <b>Proportion in multidimensional poverty</b> | <b>Number in multidimensional poverty</b> | <b>OR</b> | <b>95% CI</b> |       | <b>p-value</b> |
|----------------------------------------------------------------------|-----------------------------------------------|-------------------------------------------|-----------|---------------|-------|----------------|
| No condition                                                         | 4%                                            | 440 500                                   |           | REFERENCE     |       |                |
| Mental and behavioural disorders                                     | 36%                                           | 220 900                                   | 13.83     | 11.76         | 16.26 | <.0001         |
| Depression/mood affective disorders                                  | 34%                                           | 71 600                                    | 9.86      | 7.72          | 12.61 | <.0001         |
| Congenital malformations, deformations and chromosomal abnormalities | 23%                                           | 10 900                                    | 9.82      | 5.70          | 16.92 | <.0001         |
| Certain infectious and parasitic diseases                            | 38%                                           | 10 900                                    | 9.58      | 5.20          | 17.64 | <.0001         |
| Diseases of the respiratory system                                   | 43%                                           | 55 100                                    | 9.13      | 6.75          | 12.35 | <.0001         |
| Other injury/poisoning                                               | 35%                                           | 23 000                                    | 7.84      | 5.25          | 11.71 | <.0001         |
| Other diseases of the circulatory system                             | 41%                                           | 49 800                                    | 7.00      | 5.18          | 9.47  | <.0001         |
| Symptoms/signs and abnormal clinical and laboratory findings n.e.c   | 31%                                           | 38 400                                    | 6.97      | 4.93          | 9.85  | <.0001         |
| Diseases of the blood and blood forming organs                       | 33%                                           | 5 700                                     | 6.94      | 3.40          | 14.17 | <.0001         |
| Diseases of the skin and subcutaneous tissues                        | 24%                                           | 15 700                                    | 6.69      | 4.35          | 10.30 | <.0001         |
| Other diseases of the musculoskeletal system and connective tissue   | 36%                                           | 91 400                                    | 6.48      | 5.17          | 8.13  | <.0001         |
| Diseases of the eye and adnexa                                       | 31%                                           | 31 300                                    | 6.19      | 4.22          | 9.08  | <.0001         |
| Injury/accident                                                      | 23%                                           | 102 000                                   | 6.07      | 5.00          | 7.37  | <.0001         |
| Back problems                                                        | 27%                                           | 305 400                                   | 5.80      | 5.08          | 6.63  | <.0001         |
| Arthritis and related disorders                                      | 35%                                           | 316 300                                   | 5.63      | 4.88          | 6.50  | <.0001         |
| Heart Disease                                                        | 36%                                           | 80 600                                    | 5.53      | 4.35          | 7.05  | <.0001         |
| Neoplasms (tumours/cancers)                                          | 32%                                           | 31 200                                    | 5.52      | 3.90          | 7.83  | <.0001         |
| Diseases of the nervous system                                       | 20%                                           | 100 300                                   | 4.77      | 3.94          | 5.78  | <.0001         |
| Diabetes                                                             | 26%                                           | 70 600                                    | 4.31      | 3.42          | 5.45  | <.0001         |
| Diseases of the ear and                                              | 24%                                           | 68 500                                    | 4.23      | 3.32          | 5.39  | <.0001         |

|                                                     |     |         |      |      |      |        |
|-----------------------------------------------------|-----|---------|------|------|------|--------|
| mastoid process                                     |     |         |      |      |      |        |
| Other                                               | 26% | 11 600  | 4.22 | 2.45 | 7.26 | <.0001 |
| Diseases of the digestive system                    | 22% | 34 400  | 4.14 | 3.07 | 5.60 | <.0001 |
| Diseases of the genitourinary system                | 22% | 15 400  | 3.92 | 2.52 | 6.09 | <.0001 |
| Asthma                                              | 11% | 104 400 | 3.18 | 2.67 | 3.79 | <.0001 |
| Hypertension                                        | 18% | 110 000 | 2.42 | 2.01 | 2.92 | <.0001 |
| Other endocrine/nutritional and metabolic disorders | 13% | 11 600  | 2.24 | 1.40 | 3.56 | 0.0007 |
| Deafness/hearing loss                               | 15% | 22 300  | 2.13 | 1.46 | 3.08 | <.0001 |
| High cholesterol                                    | 8%  | 7 000   | 1.01 | 0.59 | 1.74 | 0.9623 |



**Chronic health conditions and poverty: a cross-sectional study using a multidimensional poverty measure**

|                                 |                                                                                                                                                                                                                          |
|---------------------------------|--------------------------------------------------------------------------------------------------------------------------------------------------------------------------------------------------------------------------|
| Journal:                        | <i>BMJ Open</i>                                                                                                                                                                                                          |
| Manuscript ID:                  | bmjopen-2013-003397.R2                                                                                                                                                                                                   |
| Article Type:                   | Research                                                                                                                                                                                                                 |
| Date Submitted by the Author:   | 23-Oct-2013                                                                                                                                                                                                              |
| Complete List of Authors:       | Callander, Emily; University of Sydney, NHMRC Clinical Trials Centre<br>Schofield, Deborah; University of Sydney, NHMRC Clinical Trials Centre<br>Shrestha, Rupendra; University of Sydney, NHMRC Clinical Trials Centre |
| <b>Primary Subject Heading</b>: | Health economics                                                                                                                                                                                                         |
| Secondary Subject Heading:      | Health policy, Public health, Sociology                                                                                                                                                                                  |
| Keywords:                       | HEALTH ECONOMICS, PUBLIC HEALTH, Health policy < HEALTH SERVICES ADMINISTRATION & MANAGEMENT                                                                                                                             |
|                                 |                                                                                                                                                                                                                          |

SCHOLARONE™  
Manuscripts



1  
2  
3 **Chronic health conditions and poverty: a cross-sectional study using a**  
4 **multidimensional poverty measure**  
5

6  
7 Emily J. Callander<sup>a</sup>, Deborah J. Schofield<sup>a,b</sup>, Rupendra N. Shrestha<sup>a</sup>  
8

9 <sup>a</sup> NHMRC Clinical Trials Centre, University of Sydney, Locked Bag 77, Camperdown NSW  
10 1450 Australia  
11

12 <sup>b</sup> School of Public Health, University of Sydney, Locked Bag 77, Camperdown NSW 1450  
13 Australia  
14

15  
16  
17  
18 Corresponding Author:  
19

20 Emily Callander  
21 NHMRC Clinical Trials Centre,  
22 Locked Bag 77, Camperdown NSW 1450 Australia  
23 E: [emily.callander@sydney.edu.au](mailto:emily.callander@sydney.edu.au)  
24 P: +61 2 9562 5068 or +61 4 2278 0265  
25  
26  
27

28 Keywords: Living standards, poverty, health conditions, cost of disability  
29  
30  
31

32 Word count: 3,083  
33  
34

35 Ethics:

36 Ethics approval was obtained from the University of Sydney Human Ethics Committee.  
37  
38  
39  
40  
41  
42  
43  
44  
45  
46  
47  
48  
49  
50  
51  
52  
53  
54  
55  
56  
57  
58  
59  
60

## ABSTRACT

### Objectives

To identify the chronic health conditions associated with multidimensional poverty.

### Design

Cross-sectional study of the nationally representative *Survey of Disability, Ageing and Carers*, conducted by the Australian Bureau of Statistics.

### Setting

Australian population in 2003

### Participants

35,704 individuals randomly selected from the Australian population by the Australian Bureau of Statistics.

### Outcome measures

Multidimensional poverty status, costs of disability, SF-6D health utility score, income, education attainment.

### Results

Amongst those who were multidimensionally poor, 75% had a chronic health condition and the most common health conditions were back problems (11% of those in multidimensional poverty had back problems), and arthritis (11%). The conditions with the highest proportion of individuals in multidimensional poverty were depression/mood affecting disorders (26% in multidimensional poverty) and mental and behavioural disorders (22%). Those with depression/mood affecting disorders were nearly 7 times (OR 6.60, 95% CI: 5.09 – 8.55,  $p < .0001$ ) more likely to be multidimensionally poor than those with no health condition.

1  
2  
3 Equivalising for the additional costs of disability increased the proportion of individuals in  
4  
5 multidimensional poverty for all conditions and the conditions with the highest proportion of  
6  
7 individuals in multidimensional poverty changed.  
8  
9

### 10 **Conclusions**

11  
12 Due to the influence of certain health conditions on poverty status, health interventions have  
13  
14 the potential to improve national living standards and poverty rates in a similar way that  
15  
16 'traditional' policy responses such as changes to welfare payment currently do. Using a  
17  
18 multidimensional poverty measure reveals the health conditions that should be the focus of  
19  
20 such efforts.  
21  
22  
23  
24  
25  
26  
27  
28  
29  
30  
31  
32  
33  
34  
35  
36  
37  
38  
39  
40  
41  
42  
43  
44  
45  
46  
47  
48  
49  
50  
51  
52  
53  
54  
55  
56  
57  
58  
59  
60

## Article Summary

### *Article Focus*

- Multidimensional poverty status of people with various chronic health conditions
- The influence of costs of disability on multidimensional poverty status

### *Key messages*

- Amongst those who were multidimensionally poor the most commonly reported health conditions were back problems, and arthritis
- Those with depression were nearly 7 times more likely to be multidimensionally poor than those with no health condition
- Equivalising for the additional costs of disability changed the conditions with the highest proportion of individuals in multidimensional poverty

### *Strengths and limitations*

- Uses Australia's first measure of multidimensional poverty
- Takes into consideration education attainment and overall health status (measured by the SF-6D) as well as income when assessing people's poverty status

## INTRODUCTION

Standard of living is a broad concept that loosely relates to the overall life of an individual, and the quality of that life. Poverty studies seek to measure an individual's living standards, with those who have a 'poor' standard of living being seen as living in poverty (1, 2).

Traditionally, poverty has been measured based upon an individual's available income; however, it is now accepted that income gives too narrow a view of an individual's overall living standards and other indicators of living standards are needed (3, 4). The capabilities theory of Sen has been at the forefront of the movement away from the uni-dimensional income approach to poverty measurement, with Sen defining poverty as a lack of freedom due to "the deprivation of basic capabilities" (5). Capabilities are resources, attributes or circumstances that give an individual the capacity to adequately function and engage with the society they live in, and the ability to do things an individual values (5). This shift in conceptualising poverty and living standards has given rise to the now-widespread use of multidimensional poverty measures (6-10). These measures still seek to measure living standards and identify those living in poverty, however they use multiple indicators not just income.

Overall health status imparts a massive impact upon an individual's living standards by directly influencing what physical and mental functioning they can undertake, and is often seen as a basic capability (5, 11-14). Furthermore, health status affects living standards indirectly through limiting education and financial resources: poor health status may reduce the ability to undertake education (15-17), and may also limit economic resources through restricting employment (18-21). For a detailed discussion of how health acts as a key capability and determinant of living standards see (22).

1  
2  
3 In recognition of the importance of good health for adequate living standards, health status  
4 has been included as a key component in numerous measures of poverty (9, 23-25), including  
5 the Freedom Poverty Measure within Australia (22). The Freedom Poverty Measure, a  
6 multidimensional measure of poverty, sees overall health status and education attainment as  
7 impacting upon living standards in a similar way that low income does (22). Under the  
8 Freedom Poverty Measure overall health status, in part, determines poverty status: those in  
9 multidimensional poverty<sup>1</sup> have a low income and either poor overall health status or an  
10 insufficient level of education attainment.  
11  
12  
13  
14  
15  
16  
17  
18  
19

20  
21 Including health in a measure of poverty provides the opportunity for cross-portfolio  
22 responses to improving the living standards of disadvantaged members of society – with  
23 health being seen as key contributor to low living standards, health interventions have the  
24 potential to be a direct policy response to improving living standards alongside existing  
25 measures such as reform to social security arrangements (26). However, different chronic  
26 health conditions are likely to have varying impacts upon living standards, with some  
27 conditions more severely affecting living standards than others<sup>2</sup>. This paper will look at the  
28 relationship between multidimensional poverty, measured using the Freedom Poverty  
29 Measure, and specific chronic health conditions in the Australian population to determine  
30 which chronic health conditions are associated with multidimensional poverty (being  
31 disadvantaged in terms of income AND education or health) and as such their prevention or  
32 treatment should be targeted as a cross-portfolio concern.  
33  
34  
35  
36  
37  
38  
39  
40  
41  
42  
43  
44  
45  
46  
47  
48  
49  
50

---

51 <sup>1</sup> The use of both income measures of poverty and multidimensional measures of poverty in the literature  
52 creates the need to clarify which measure is being used. Hence people may be labelled as being in 'income  
53 poverty' or in 'multidimensional poverty' depending on which measure was used – both refer to a state of low  
54 living standards. The term 'freedom poverty' refers to those who are identified as being in multidimensional  
55 poverty using the Freedom Poverty Measure.

56 <sup>2</sup> Within this paper a chronic health condition refers to a specific ailment that has lasted, or is likely to last, for  
57 six months or more.  
58  
59  
60

## METHODS

### *Data source*

The 2003 Survey of Disability, Ageing and Carers (SDAC) provided the data source for this paper. The SDAC provided detailed self-reported data on socio-demographic status, labour force participation, health and disability status, chronic health conditions, and economic information on individuals and their families<sup>3</sup> (27).

The 2003 SDAC is a comprehensive, nationally representative survey conducted by the Australian Bureau of Statistics (ABS) between 23 June 2003 to 1 November 2003 (28). The survey covered individuals in all states and territories, including both rural and urban populations – however, those in very remote areas were excluded. As these areas make up only 1% of the population, the ABS deemed that this would not affect the robustness of the data (29). Both private dwellings and care-accommodation establishments were included in the sample, with a response rate of 89% for private dwellings and 92% for care-accommodation establishments (30). Despite the high response rate for the survey, the potential for non-response bias cannot be excluded. It has been noted previously in Australia that people with lower education attainment have been less likely to participate in surveys (31); hence this paper may underestimate the number of people in multidimensional poverty. The ABS sought to reduce non response bias through survey design and estimation procedures (30), and the use of weighted data in this analysis would also reduce non response bias, although it cannot be excluded entirely. The original 2003 SDAC data was weighted by the ABS against the 2001 Census of Population and Housing to represent the Australian

---

<sup>3</sup> At the time of writing this paper the 2003 SDAC was the most current dataset that contains detailed and accurate income, health and education information on the one survey.

1  
2  
3 population in 2003 by broad population variables such as age, sex, state/territory and section  
4  
5 of state (27).  
6  
7

### 8 *Identifying those in freedom poverty*

9

10  
11 In order to determine how various health conditions impact upon living standards the  
12  
13 Freedom Poverty Measure was utilised to identify those in multidimensional poverty. The  
14  
15 Freedom Poverty Measure combines measures of low income, poor health, and insufficient  
16  
17 education. The Freedom Poverty Measure was designed specifically for the Australian  
18  
19 population in a manner that is consistent with international poverty measurement practices  
20  
21 (7). For more detailed information on the Freedom Poverty Measure and other examples of  
22  
23 its application see (10, 18, 22, 32).  
24  
25  
26  
27

28 The income, health and education status of individuals was initially identified, as follows:  
29

- 30  
31 - If an individual's family income (measured by the income unit income (29)) was  
32  
33 below the 50% of the median income poverty line then they were considered to have  
34  
35 low income.  
36  
37 - If an individual had a poorer health utility score (measured by the Short Form 6D (SF-  
38  
39 6D) measure (33)) than the average for their age group they were considered to have  
40  
41 poor overall health status.  
42  
43 - If an individual had a highest level of education attainment lower than year 12 (for  
44  
45 those aged 25 to 64 years), or lower than Year 10 (for those aged 65 years and over)  
46  
47 they were considered to have an insufficient level of education attainment.  
48  
49  
50

51  
52 Those with low income AND either poor overall health status or an insufficient level of  
53  
54 education attainment were considered to be in 'freedom poverty' and to be  
55  
56 multidimensionally poor.  
57  
58  
59  
60



### *Identifying chronic health conditions*

The 2003 SDAC recorded any chronic health conditions, defined as health conditions that had lasted or were likely to last for six months or more, experienced by respondents. If an individual recorded multiple health conditions then their main chronic health condition was also recorded. The ABS classified respondent's chronic health conditions according to the ICD-10 health coding system. Lists of what ICD-10 codes correspond with different chronic health condition groups can be found in (27). Respondents with Alzheimer's disease and 'certain conditions originating in the perinatal period' were excluded because of their low numbers (less than 10 respondents) on the SDAC.

### *Statistical Analysis*

Initially descriptive statistics were utilised to look at the proportion of people in multidimensional poverty with a long term health condition, the most common conditions experienced by those in multidimensional poverty, and the proportion of people with various conditions in multidimensional poverty.

Following this logistic regression models were utilised to look at the odds ratio of being in multidimensional poverty for those with various chronic health conditions. Those with no chronic health conditions were used as the reference group, and the models were adjusted for age and sex. Due to the multiple comparisons being made between different chronic health conditions and no health condition (29 separate models were constructed), there is the potential for type I error to be created. To reduce the risk of this, Bonferroni correction has been undertaken with the significance level set to 0.0017 (0.05/29).

### *Sensitivity Analysis – costs of disability*

1  
2  
3  
4  
5  
6 Ill health can further impact on living standards by imparting additional costs upon  
7  
8 individuals, including the costs of treatment, support services, and medication, and it has  
9  
10 been argued that these costs should be taken into consideration when comparing incomes  
11  
12 (34). Those with chronic health conditions are likely to need higher incomes to obtain the  
13  
14 same level of living standards as those with no chronic health conditions due to the additional  
15  
16 costs of living for those with ill health. There is a small amount of literature that has  
17  
18 developed a possible means of taking these costs into consideration. Internationally this has  
19  
20 been undertaken by Zaidi and Burchardt (34), and within Australia this has been undertaken  
21  
22 by Saunders (35).  
23  
24

25  
26 Using the methods developed by Saunders to measure the costs associated with disability, a  
27  
28 sensitivity analysis was undertaken to look at the difference in the number of people in  
29  
30 multidimensional poverty as a result of accounting for the extra costs of disability. The long  
31  
32 term health conditions associated with multidimensional poverty when the additional costs of  
33  
34 disability in adults were taken into consideration was also examined. It is acknowledged by  
35  
36 the authors that there is a number of limitations to this approach, including the exclusion of  
37  
38 children in the methods developed by Saunders and also possible limitations in the use of  
39  
40 disability classification to estimate the costs of health (36). However, this sensitivity will still  
41  
42 provide an example of how taking into consideration the costs of disability will affect the  
43  
44 financial situation of individuals and hence the numbers in multidimensional poverty.  
45  
46  
47  
48

## **RESULTS**

49  
50  
51  
52  
53 There were 35 704 respondents in the SDAC, and of these 3 469 were in multidimensional  
54  
55 poverty. Once weighted these data represented 19 320 000 individuals in the 2003 Australian  
56  
57  
58  
59  
60

1  
2  
3 population in private households, of which 1 857 000 were multidimensionally poor (10%).

4  
5 Of the Australian population in 2003, 40% identified having a long term health condition.

6  
7  
8 Not all individuals with a chronic health condition had poor overall health status, with 74% of  
9  
10 individuals with a chronic health condition having good overall health status, indicating that  
11  
12 their health condition had only a mild impact on their overall health status. Table 1 shows the  
13  
14 overall health status of those with various chronic health conditions. Conditions with a  
15  
16 relatively low proportion of individuals reporting poor overall health status included high  
17  
18 cholesterol, hypertension and asthma.  
19  
20

21  
22 Amongst those who were multidimensionally poor, 75% identified having a chronic health  
23  
24 condition. Of those with a chronic health condition, 18% were in multidimensional poverty;  
25  
26 whereas for those with no chronic health condition 4% were in multidimensional poverty  
27  
28 (Table 2). Those with a long term health condition were 3 times more likely to be in  
29  
30 multidimensional poverty than those with no health condition, after controlling for age and  
31  
32 sex (OR 3.38, 95% CI: 3.06 – 3.76,  $p < .0001$ ).  
33  
34  
35

36  
37 Amongst those in multidimensional poverty the most common health conditions were back  
38  
39 problems (11% of those in multidimensional poverty had back problems), arthritis and related  
40  
41 disorders (11%), followed by mental and behavioural disorders (9%), hypertension (4%),  
42  
43 asthma (4%) and injury/accident (4%). Amongst the individual health conditions, the  
44  
45 condition with the highest proportion in multidimensional poverty was depression/mood  
46  
47 affecting disorders (26% were in multidimensional poverty), mental and behavioural  
48  
49 disorders (22% were in multidimensional poverty), certain infectious and parasitic diseases  
50  
51 (22% were in multidimensional poverty), and diseases of the respiratory system (22% were in  
52  
53 multidimensional poverty) (Table 3).  
54  
55  
56  
57  
58  
59  
60

1  
2  
3 After controlling for age and sex there was no significant difference in the likelihood of being  
4  
5 in multidimensional poverty between those with no chronic health condition and those with  
6  
7 high cholesterol ( $p=0.3794$ ), deafness/noise induced hearing loss ( $p=0.3938$ ), conditions  
8  
9 grouped by the ABS into 'other 2003 codes which had no ICD-10 equivalent' ( $p=0.2993$ ),  
10  
11 mental and behavioural disorders ( $p=0.0441$ ), diseases of the blood and blood forming organs  
12  
13 ( $p=0.0036$ ), diabetes ( $p=0.0441$ ), and diseases of the genitourinary system ( $0.0018$ ). Those  
14  
15 with depression/mood affecting disorders were nearly 7 times (OR 6.60, 95% CI: 5.09 – 8.55,  
16  
17  $p<.0001$ ) more likely to be in multidimensional poverty than those with no chronic health  
18  
19 condition. The odds of being in multidimensional poverty for other chronic health conditions,  
20  
21 compared to those with no health condition are shown in Table 3.  
22  
23  
24

### 25 26 *Costs of disability*

27  
28  
29 Before equivalising income for disability status there were 1 875 000 individuals in  
30  
31 multidimensional poverty. After equivalising family income for the costs of disability in  
32  
33 adults there were 2 462 000 individuals in multidimensional poverty. After equivalising  
34  
35 income for the costs of disability in adults, 82% of people in multidimensional poverty  
36  
37 identified having a chronic health condition – an increase of 8 percentage points. Of those  
38  
39 with a chronic health condition, 27% were in multidimensional poverty; whereas for those  
40  
41 with no chronic health condition 5% were in multidimensional poverty after equivalising for  
42  
43 the costs of disability. Those with a chronic health condition were now more than 5 times  
44  
45 more likely to be in multidimensional poverty than those with no chronic health condition,  
46  
47 after controlling for age and sex (OR 5.57, 95% CI: 5.07 – 6.12,  $p<.0001$ ).  
48  
49  
50

51  
52 After equivalising for the costs of disability in adults, the most common chronic health  
53  
54 conditions amongst those in multidimensional poverty were still arthritis and related  
55  
56  
57  
58  
59  
60

1  
2  
3 disorders (13%), back problems (12%), mental and behavioural disorders (9%), hypertension  
4 (5%) and asthma (4%). The conditions with the highest proportion of individuals in  
5 multidimensional poverty were diseases of the respiratory system (43% were in  
6 multidimensional poverty) and other diseases of the circulatory system (41% were in  
7 multidimensional poverty). The proportion of individuals in multidimensional poverty in  
8 each of these conditions increased after taking into consideration the costs of disability in  
9 adults when equivalising income, and the conditions with the highest proportion of  
10 individuals in multidimensional poverty also changed (Table 4).  
11  
12  
13  
14  
15  
16  
17  
18  
19

20  
21 After controlling for age and sex, those with mental and behavioural disorders were nearly 14  
22 times more likely to be in multidimensional poverty than those with no health condition after  
23 equivalising income for disability in adults (OR 13.83, 95% CI: 11.76 – 16.26,  $p < .0001$ ). All  
24 chronic health conditions with the exception of high cholesterol ( $p = 0.9623$ ) were  
25 significantly more likely to be in multidimensional poverty than those with no chronic health  
26 condition (Table 4).  
27  
28  
29  
30  
31  
32  
33  
34  
35

## 36 DISCUSSION

37  
38  
39 The results have shown that those with a chronic health condition were significantly more  
40 likely to be in multidimensional poverty than those without a chronic health condition, with  
41 18% of those with a chronic health condition being in multidimensional poverty, compared to  
42 only 4% of those without a chronic health condition. Of those in multidimensional poverty,  
43 74% had a long term health condition.  
44  
45  
46  
47  
48  
49

50  
51 The results of the sensitivity analysis show that after equivalising income for adult disability,  
52 there was a 3 percentage point increase in the proportion of the population in  
53 multidimensional poverty, and a 9 percentage point increase in the proportion of individuals  
54  
55  
56  
57  
58  
59  
60

1  
2  
3 with a chronic health condition in multidimensional poverty. However, there is opportunity to  
4 improve the methods by which the costs of ill health are produced by including children in  
5 the methodology and having further consideration as to how health is measured. In spite of  
6 this, the sensitivity analysis has shown the additional burden chronic health conditions can  
7 have upon living standards – through the economic burden placed upon families as a result of  
8 disability.  
9

10  
11  
12  
13  
14  
15  
16  
17 Chronic health conditions impact upon living standards in a number of ways. Having a  
18 chronic health condition results in an increased likelihood of being out of the labour force  
19 (19), with recent Australian studies showing that being out of the labour force is associated  
20 with low incomes and high rates of income poverty (37, 38). Furthermore, having a chronic  
21 health condition is likely to affect an individual's overall health status – however, as this  
22 study has shown, different chronic health conditions have varying impacts upon overall  
23 health status, with some chronic health conditions such as hypertension or asthma having few  
24 people reporting poor overall health status.  
25  
26  
27  
28  
29  
30  
31  
32  
33  
34  
35

36 The chronic health conditions most commonly associated with multidimensional poverty  
37 were arthritis and related disorders, back problems and mental and behavioural disorders – all  
38 of which have been shown to be preventable. There are numerous interventions for each of  
39 these conditions that have been shown to be cost-effective in either preventing the onset of  
40 the condition or reducing the severity of the condition (39-42). When considering the  
41 additional costs of low living standards the further benefits of such intervention programs  
42 become more apparent.  
43  
44  
45  
46  
47  
48  
49  
50

51  
52  
53 Political rhetoric is currently shifting to advocate the use of cross-portfolio responses to  
54 social issues (43). As such, there is opportunity for health interventions to be taken up in  
55  
56  
57  
58  
59  
60

1  
2  
3 government departments other than those traditionally responsible for health care, and be  
4 included alongside other efforts to improve living standards such as education and skills  
5 reform, and social security reform. Using the Freedom Poverty Measure reveals the chronic  
6 health conditions that are experienced by the most disadvantaged people in society and  
7 should be the focus of political efforts to improve living standards.  
8  
9

### 10 11 12 13 14 **FUNDING SOURCE**

15  
16  
17  
18 This study was funded partly by an National Health and Medical Research Council  
19 (NHMRC) Doctoral Scholarship and an NHMRC Early Career Fellowship.  
20  
21

### 22 23 24 **COMPETING INTERESTS**

25  
26  
27 None  
28

### 29 30 31 **DATA SHARING**

32 The dataset used in this study, the 2003 Survey of Disability, Ageing and Carers, is publically  
33 available for the Australian Bureau of Statistics upon application.  
34  
35

### 36 37 38 **CONTRIBUTORSHIP**

39 EC conceived, designed and led the study. EC undertook data analysis and drafted the  
40 manuscript. DS and RS provided guidance on data analysis, and contributed to the drafting of  
41 the manuscript. All authors edited the final manuscript.  
42  
43  
44  
45  
46  
47  
48  
49  
50  
51  
52  
53  
54  
55  
56  
57  
58  
59  
60

**REFERENCES**

1. Greenwell H, Lloyd R, Harding A. An introduction to poverty measurement issues. Canberra: National Centre for Social and Economic Modelling (NATSEM)2001.
2. Townsend P. Poverty in the United Kingdom. Harmondsworth: Penguin; 1979.
3. Travers P, Richardson S. Living Decently: Material well-being in Australia. Melbourne: Oxford University Press; 1993.
4. Stiglitz J, Sen A, Fitoussi J. Report by the Commission on the Measurement of Economic Performance and Social Progress. Paris: Commission on the Measurement of Economic Performance and Social Progress2009.
5. Sen AK. Development as Freedom. Oxford: Oxford University Press; 1999.
6. Alkire S, Santos M. A Multidimensional Approach: Poverty Measurement & Beyond. Social Indicators Research. 2013;112(2):239-57.
7. Alkire S, Foster JE. Counting and multidimensional poverty measurement. Journal of Public Economics. 2011;95(7-8):476-87.
8. United Nations Development Programme. Human Development Report 2008. New York: United Nations2008.
9. United Nations Development Programme. Multidimensional Poverty Index. New York: United Nations Development Programme; 2010 [cited 2011 21 May]; Available from: <http://hdr.undp.org/en/statistics/mpi/>.
10. Callander E, Schofield D, Shrestha R. Multi-dimensional poverty in Australia and the barriers ill health imposes on the employment of the disadvantaged. Journal of Socio Economics. 2011;40:736-42.
11. Council of Australian Governments. Human Capital Reform. Canberra: Council of Australian Governments; 2006.
12. Council of Australian Governments. Council of Australian Governments Meeting 10 February 2006 Communique.



- 1  
2  
3 [http://www.alga.asn.au/newsroom/communiques/01.coag/COAG\\_Communique\\_20060210.pdf](http://www.alga.asn.au/newsroom/communiques/01.coag/COAG_Communique_20060210.pdf):  
4 COAG2006.  
5  
6  
7 13. Sen AK. Human capital and human capability. *World Development*. 1997;25(12):1959-61.  
8  
9  
10 14. Sen AK. *Public Health, ethics and equity*. Oxford: Oxford University Press; 2004.  
11  
12  
13 15. Mushkin SJ. Health as an investment. *The Journal of Political Economy*. 1962;70(5):129-57.  
14  
15 16. Laplagne P, Glover M, Shomos A. *Effects of health and education on labour force*  
16 *participation*. Canberra: Productivity Commission2007.  
17  
18  
19 17. Australian Bureau of Statistics. *Australian Social Trends*, March 2011. Canberra: ABS2011.  
20  
21  
22 18. Callander E, Schofield D, Shrestha R. Capacity for freedom - a new way of measuring poverty  
23 amongst Australian children. *Child Indicators Research*. 2012;5(1):179-98.  
24  
25  
26 19. Schofield D, Shrestha R, Passey M, et al. Chronic disease and labour force participation  
27 among older Australians. *Medical Journal of Australia*. 2008;189(8):447-50.  
28  
29  
30 20. Nepal B, Payne A, Brown L. *Healthy, wealthy and wise? The relationship between health,*  
31 *employment and earnings in Australia*. Sydney: AMP2009.  
32  
33  
34 21. Schofield D, Kelly S, Shrestha R, et al. Long term financial impacts of CVD: Living standards in  
35 retirement. *International Journal of Cardiology*. 2010;155(3):406-08.  
36  
37  
38 22. Callander E, Schofield D, Shrestha R. Towards a holistic understanding of poverty: a new  
39 multidimensional measure of poverty for Australia. *Health Sociology Review*. 2012;21(2):138-52.  
40  
41  
42 23. Lugo MA. Comparing Multidimensional Indices of Inequality: methods and application.  
43 *Research on Economic Inequality*. 2007;14:213-36.  
44  
45  
46 24. Nilsson T. *Measuring Changes in Multidimensional Inequality-An Empirical Application*2007.  
47  
48  
49 25. Noble M, McLennan D, Wilkinson K, et al. *The English indices of deprivation 2010*. London:  
50 Department of Communities and Local Government2010.  
51  
52  
53 26. Swan W. Budget Speech 2011-12. Online: [http://www.budget.gov.au/2011-](http://www.budget.gov.au/2011-12/content/speech/html/speech.htm)  
54 [12/content/speech/html/speech.htm](http://www.budget.gov.au/2011-12/content/speech/html/speech.htm): Australian Government; 2011.  
55  
56  
57  
58  
59  
60

- 1  
2  
3 27. Australian Bureau of Statistics. Information Paper - Basic Confidentialised Unit Record File:  
4 Survey of Disability, Ageing and Carers 2003 (reissue) Canberra: ABS2004.  
5  
6  
7 28. Australian Bureau of Statistics. Disability, ageing and carers, Australia: Users guide  
8 4431.0.55.001. Canberra: ABS; 2004.  
9  
10  
11 29. Australian Bureau of Statistics. Information Paper - Basic Confidentialised Unit Record File:  
12 Survey of Disability, Ageing and Carers 2003 (reissue) Canberra: ABS2005.  
13  
14  
15 30. Australian Bureau of Statistics. Information Paper - Disability, Ageing and Carers, Australia:  
16 User Guide ABS 4431.0.55.001. Canberra: ABS; 2003.  
17  
18  
19  
20 31. Turrell G, Patterson C, Oldenburg B, et al. The socio-economic patterning of survey  
21 participation and non-response error in a multilevel study of food purchasing behaviour: area-and  
22 individual-level characteristics. *Public health nutrition*.6(2):181-90.  
23  
24  
25 32. Callander E, Schofield D, Shrestha R. Freedom poverty: A new tool to identify the multiple  
26 disadvantages affecting those with CVD. *International Journal of Cardiology*. 2013;166(2):321-6.  
27  
28  
29  
30 33. Brazier JE, Roberts J. The Estimation of a Preference-Based Measure of Health From the SF-  
31 12. *Medical Care*. 2004;42:851-9.  
32  
33  
34 34. Zaidi A, Burchardt T. Comparing incomes when needs differ: Equivalization for the extra  
35 costs of disability in the U.K. *Review of Income and Wealth*. 2005;51(1):89-114.  
36  
37  
38 35. Saunders P. The costs of disability and the incidence of poverty. Sydney: Social Policy  
39 Research Centre (SPRC), University of New South Wales2006.  
40  
41  
42 36. Mont D. Measuring Disability Prevalence, SP Discussion Paper. New York: The World  
43 Bank2007.  
44  
45  
46 37. Schofield D, Shrestha R, Percival R, et al. Economic Impacts of Illness in Older Workers:  
47 Quantifying the impact of illness on income, tax revenue and government spending. *BMC Public*  
48 *Health*. 2011;11(418).  
49  
50  
51  
52 38. Schofield DJ, Callander EJ, Shrestha RN, et al. Premature retirement due to ill health and  
53 income poverty: a cross-sectional study of older workers. *BMJ Open*. 2013;3(5).  
54  
55  
56  
57  
58  
59  
60

- 1  
2  
3 39. Vos T, Carter R, Barendregt JJ, et al. Assessing Cost-Effectiveness in Prevention (ACE  
4 Prevention): Final Report. Brisbane and Melbourne: University of Queensland and Deakin  
5 University 2010.  
6  
7  
8  
9 40. Puolakka K, Kautiainen H, Mottonen T, et al. Impact of initial aggressive drug treatment with  
10 a combination of disease-modifying antirheumatic drugs on the development of work disability in  
11 early rheumatoid arthritis: a five-year randomized followup trial. *Arthritis Rheum.* 2004 Jan;50(1):55-  
12 62.  
13  
14  
15  
16 41. Linton SJ, van Tulder MW. Preventive Interventions for Back and Neck Pain Problems: What  
17 is the Evidence? *Spine.* 2001;26(7):778-87.  
18  
19  
20  
21 42. Barretta B, Byford S, Knappa M. Evidence of cost-effective treatments for depression: a  
22 systematic review. *Journal of Affective Disorders* 2005;84:1-13.  
23  
24  
25 43. Social Inclusion Unit. The Australian Public Service Social Inclusion policy design and delivery  
26 toolkit In: Department of the Prime Minister and Cabinet, editor. Canberra 2009.  
27  
28  
29  
30  
31  
32  
33  
34  
35  
36  
37  
38  
39  
40  
41  
42  
43  
44  
45  
46  
47  
48  
49  
50  
51  
52  
53  
54  
55  
56  
57  
58  
59  
60

**Table 1: Overall health status of those with different chronic health conditions**

| <b>Long term health condition</b>                                    | <b>Proportion with poor overall health status, measured by SF-6D</b> |
|----------------------------------------------------------------------|----------------------------------------------------------------------|
| Depression/ mood affective disorders                                 | 22%                                                                  |
| Congenital malformations, deformations and chromosomal abnormalities | 49%                                                                  |
| Symptoms/signs and abnormal clinical and laboratory findings n.e.c   | 36%                                                                  |
| Certain infectious and parasitic diseases                            | 41%                                                                  |
| Mental and behavioural disorders                                     | 46%                                                                  |
| Diseases of the respiratory system                                   | 42%                                                                  |
| Other injury/poisoning                                               | 40%                                                                  |
| Injury/accident                                                      | 25%                                                                  |
| Diseases of the blood and blood forming organs                       | 52%                                                                  |
| Back problems                                                        | 32%                                                                  |
| Diseases of the skin and subcutaneous tissues                        | 28%                                                                  |
| Other diseases of the musculoskeletal system and connective tissue   | 40%                                                                  |
| Arthritis and related disorders                                      | 31%                                                                  |
| Heart Disease                                                        | 33%                                                                  |
| Diseases of the eye and adnexa                                       | 33%                                                                  |
| Other diseases of the circulatory system                             | 43%                                                                  |
| Diabetes                                                             | 12%                                                                  |
| Neoplasms (tumours/cancers)                                          | 33%                                                                  |
| Diseases of the ear and mastoid process                              | 23%                                                                  |
| Diseases of the nervous system                                       | 27%                                                                  |
| Diseases of the digestive system                                     | 17%                                                                  |
| Diseases of the genitourinary system                                 | 17%                                                                  |
| Asthma                                                               | 10%                                                                  |
| Hypertension                                                         | 5%                                                                   |
| Other endocrine/nutritional and metabolic disorders                  | 11%                                                                  |
| Other                                                                | 32%                                                                  |
| Deafness/hearing loss                                                | 15%                                                                  |
| High cholesterol                                                     | 2%                                                                   |

1  
2  
3  
4  
5  
6  
7  
8  
9  
10  
11  
12  
13  
14  
15  
16  
17  
18  
19  
20  
21  
22  
23  
24  
25  
26  
27  
28  
29  
30  
31  
32  
33  
34  
35  
36  
37  
38  
39  
40  
41  
42  
43  
44  
45  
46  
47  
48  
49  
50  
51  
52  
53  
54  
55  
56  
57  
58  
59  
60

**Table 2: Number of individuals in multidimensional poverty by health status, 2003**

|                                            | <b>In Multidimensional Poverty</b> | <b>Not in Multidimensional Poverty</b> |
|--------------------------------------------|------------------------------------|----------------------------------------|
| Has a long term health condition           | 1 387 000                          | 6 371 000                              |
| Does not have a long term health condition | 449 000                            | 11 113 000                             |

For peer review only

**Table 3: Multidimensional poverty status of those with varying long term health conditions, 2003**

| Long term health condition                                           | Total number | Proportion in multidimensional poverty | Number in multidimensional poverty | OR   | 95% CI    |       | p-value |
|----------------------------------------------------------------------|--------------|----------------------------------------|------------------------------------|------|-----------|-------|---------|
| No condition                                                         | 11 562 200   | 4%                                     | 488 700                            |      | REFERENCE |       |         |
| Depression/ mood affective disorders                                 | 208 400      | 28%                                    | 57 300                             | 6.60 | 5.09      | 8.55  | <.0001  |
| Congenital malformations, deformations and chromosomal abnormalities | 48 200       | 17%                                    | 8 000                              | 5.53 | 3.07      | 9.99  | <.0001  |
| Symptoms/signs and abnormal clinical and laboratory findings n.e.c   | 124 700      | 24%                                    | 29 500                             | 4.71 | 3.29      | 6.76  | <.0001  |
| Certain infectious and parasitic diseases                            | 28 200       | 24%                                    | 6 800                              | 4.66 | 2.36      | 9.17  | <.0001  |
| Mental and behavioural disorders                                     | 621 800      | 27%                                    | 164 900                            | 4.60 | 1.04      | 20.35 | 0.0441  |
| Diseases of the respiratory system                                   | 127 900      | 27%                                    | 34 200                             | 4.49 | 3.24      | 6.23  | <.0001  |
| Other injury/poisoning                                               | 65 900       | 23%                                    | 14 900                             | 4.17 | 2.63      | 6.62  | <.0001  |
| Injury/accident                                                      | 434 700      | 17%                                    | 74 900                             | 3.85 | 3.11      | 4.77  | <.0001  |
| Diseases of the blood and blood forming organs                       | 17 200       | 22%                                    | 3 700                              | 3.72 | 1.53      | 9.00  | 0.0036  |
| Back problems                                                        | 1 128 200    | 19%                                    | 210 100                            | 3.49 | 3.01      | 4.04  | <.0001  |
| Diseases of the skin and subcutaneous tissues                        | 65 700       | 15%                                    | 9 900                              | 3.41 | 2.06      | 5.65  | <.0001  |
| Other diseases of the musculoskeletal system and connective tissue   | 251 600      | 22%                                    | 56 300                             | 3.35 | 2.59      | 4.33  | <.0001  |
| Arthritis and related disorders                                      | 902 200      | 23%                                    | 207 200                            | 3.27 | 2.79      | 3.83  | <.0001  |
| Heart Disease                                                        | 225 100      | 23%                                    | 52 300                             | 3.24 | 2.47      | 4.26  | <.0001  |
| Diseases of the eye and adnexa                                       | 99 800       | 19%                                    | 19 100                             | 3.18 | 2.08      | 4.86  | <.0001  |
| Other diseases of the                                                | 122 600      | 22%                                    | 27 600                             | 3.13 | 2.21      | 4.44  | <.0001  |

|                                                     |         |     |        |      |      |      |        |
|-----------------------------------------------------|---------|-----|--------|------|------|------|--------|
| circulatory system                                  |         |     |        |      |      |      |        |
| Diabetes                                            | 271 100 | 19% | 51 700 | 2.99 | 2.31 | 3.87 | 0.0441 |
| Neoplasms (tumours/cancers)                         | 97 000  | 19% | 18 800 | 2.90 | 1.92 | 4.37 | <.0001 |
| Diseases of the ear and mastoid process             | 284 800 | 10% | 47 800 | 2.73 | 2.08 | 3.59 | <.0001 |
| Diseases of the nervous system                      | 491 800 | 13% | 65 500 | 2.67 | 2.14 | 3.32 | <.0001 |
| Diseases of the digestive system                    | 154 100 | 14% | 21 900 | 2.37 | 1.67 | 3.38 | <.0001 |
| Diseases of the genitourinary system                | 70 800  | 14% | 9 900  | 2.28 | 1.36 | 3.82 | 0.0018 |
| Asthma                                              | 925 200 | 8%  | 76 600 | 2.01 | 1.65 | 2.44 | <.0001 |
| Hypertension                                        | 604 200 | 14% | 83 200 | 1.84 | 1.50 | 2.26 | <.0001 |
| Other endocrine/nutritional and metabolic disorders | 87 300  | 10% | 8 500  | 1.55 | 0.92 | 2.62 | 0.1015 |
| Other                                               | 44 700  | 11% | 4 812  | 1.48 | 0.71 | 3.10 | 0.2993 |
| Deafness/hearing loss                               | 153 300 | 8%  | 12 975 | 1.22 | 0.77 | 1.94 | 0.3938 |
| High cholesterol                                    | 92 900  | 6%  | 5 211  | 0.77 | 0.43 | 1.39 | 0.3794 |

**Table 4: Multidimensional poverty status of those with varying long term health conditions, after equivalising income for the cost of disability in adults, 2003**

| Long term health condition                                           | Proportion in multidimensional poverty | Number in multidimensional poverty | OR    | 95% CI    |       | p-value |
|----------------------------------------------------------------------|----------------------------------------|------------------------------------|-------|-----------|-------|---------|
| No condition                                                         | 4%                                     | 440 500                            |       | REFERENCE |       |         |
| Mental and behavioural disorders                                     | 36%                                    | 220 900                            | 13.83 | 11.76     | 16.26 | <.0001  |
| Depression/mood affective disorders                                  | 34%                                    | 71 600                             | 9.86  | 7.72      | 12.61 | <.0001  |
| Congenital malformations, deformations and chromosomal abnormalities | 23%                                    | 10 900                             | 9.82  | 5.70      | 16.92 | <.0001  |
| Certain infectious and parasitic diseases                            | 38%                                    | 10 900                             | 9.58  | 5.20      | 17.64 | <.0001  |
| Diseases of the respiratory system                                   | 43%                                    | 55 100                             | 9.13  | 6.75      | 12.35 | <.0001  |
| Other injury/poisoning                                               | 35%                                    | 23 000                             | 7.84  | 5.25      | 11.71 | <.0001  |
| Other diseases of the circulatory system                             | 41%                                    | 49 800                             | 7.00  | 5.18      | 9.47  | <.0001  |
| Symptoms/signs and abnormal clinical and laboratory findings n.e.c   | 31%                                    | 38 400                             | 6.97  | 4.93      | 9.85  | <.0001  |
| Diseases of the blood and blood forming organs                       | 33%                                    | 5 700                              | 6.94  | 3.40      | 14.17 | <.0001  |
| Diseases of the skin and subcutaneous tissues                        | 24%                                    | 15 700                             | 6.69  | 4.35      | 10.30 | <.0001  |
| Other diseases of the musculoskeletal system and connective tissue   | 36%                                    | 91 400                             | 6.48  | 5.17      | 8.13  | <.0001  |
| Diseases of the eye and adnexa                                       | 31%                                    | 31 300                             | 6.19  | 4.22      | 9.08  | <.0001  |
| Injury/accident                                                      | 23%                                    | 102 000                            | 6.07  | 5.00      | 7.37  | <.0001  |
| Back problems                                                        | 27%                                    | 305 400                            | 5.80  | 5.08      | 6.63  | <.0001  |
| Arthritis and related disorders                                      | 35%                                    | 316 300                            | 5.63  | 4.88      | 6.50  | <.0001  |
| Heart Disease                                                        | 36%                                    | 80 600                             | 5.53  | 4.35      | 7.05  | <.0001  |
| Neoplasms (tumours/cancers)                                          | 32%                                    | 31 200                             | 5.52  | 3.90      | 7.83  | <.0001  |
| Diseases of the nervous system                                       | 20%                                    | 100 300                            | 4.77  | 3.94      | 5.78  | <.0001  |
| Diabetes                                                             | 26%                                    | 70 600                             | 4.31  | 3.42      | 5.45  | <.0001  |
| Diseases of the ear and                                              | 24%                                    | 68 500                             | 4.23  | 3.32      | 5.39  | <.0001  |



|                                                     |     |         |      |      |      |        |
|-----------------------------------------------------|-----|---------|------|------|------|--------|
| mastoid process                                     |     |         |      |      |      |        |
| Other                                               | 26% | 11 600  | 4.22 | 2.45 | 7.26 | <.0001 |
| Diseases of the digestive system                    | 22% | 34 400  | 4.14 | 3.07 | 5.60 | <.0001 |
| Diseases of the genitourinary system                | 22% | 15 400  | 3.92 | 2.52 | 6.09 | <.0001 |
| Asthma                                              | 11% | 104 400 | 3.18 | 2.67 | 3.79 | <.0001 |
| Hypertension                                        | 18% | 110 000 | 2.42 | 2.01 | 2.92 | <.0001 |
| Other endocrine/nutritional and metabolic disorders | 13% | 11 600  | 2.24 | 1.40 | 3.56 | 0.0007 |
| Deafness/hearing loss                               | 15% | 22 300  | 2.13 | 1.46 | 3.08 | <.0001 |
| High cholesterol                                    | 8%  | 7 000   | 1.01 | 0.59 | 1.74 | 0.9623 |

1  
2  
3 **Chronic health conditions and poverty: a cross-sectional study using a**  
4 **multidimensional poverty measure**  
5

6  
7 Emily J. Callander<sup>a</sup>, Deborah J. Schofield<sup>a,b</sup>, Rupendra N. Shrestha<sup>a</sup>  
8

9 <sup>a</sup> NHMRC Clinical Trials Centre, University of Sydney, Locked Bag 77, Camperdown NSW  
10 1450 Australia  
11

12 <sup>b</sup> School of Public Health, University of Sydney, Locked Bag 77, Camperdown NSW 1450  
13 Australia  
14

15  
16  
17  
18 Corresponding Author:  
19

20 Emily Callander  
21 NHMRC Clinical Trials Centre,  
22 Locked Bag 77, Camperdown NSW 1450 Australia  
23 E: [emily.callander@sydney.edu.au](mailto:emily.callander@sydney.edu.au)  
24 P: +61 2 9562 5068 or +61 4 2278 0265  
25  
26  
27

28 Keywords: Living standards, poverty, health conditions, cost of disability  
29  
30  
31

32 Word count: 3,083  
33

34 Ethics:

35 Ethics approval was obtained from the University of Sydney Human Ethics Committee.  
36  
37  
38  
39  
40  
41  
42  
43  
44  
45  
46  
47  
48  
49  
50  
51  
52  
53  
54  
55  
56  
57  
58  
59  
60

## ABSTRACT

### Objectives

To identify the chronic health conditions associated with multidimensional poverty.

### Design

Cross-sectional study of the nationally representative *Survey of Disability, Ageing and Carers*, conducted by the Australian Bureau of Statistics.

### Setting

Australian population in 2003

### Participants

35,704 individuals randomly selected from the Australian population by the Australian Bureau of Statistics.

### Outcome measures

Multidimensional poverty status, costs of disability, SF-6D health utility score, income, education attainment.

### Results

Amongst those who were multidimensionally poor, 75% had a chronic health condition and the most common health conditions were back problems (11% of those in multidimensional poverty had back problems), and arthritis (11%). The conditions with the highest proportion of individuals in multidimensional poverty were depression/mood affecting disorders (26% in multidimensional poverty) and mental and behavioural disorders (22%). Those with depression/mood affecting disorders were nearly 7 times (OR 6.60, 95% CI: 5.09 – 8.55,  $p < .0001$ ) more likely to be multidimensionally poor than those with no health condition.

1  
2  
3 Equivalising for the additional costs of disability increased the proportion of individuals in  
4  
5 multidimensional poverty for all conditions and the conditions with the highest proportion of  
6  
7 individuals in multidimensional poverty changed.  
8  
9

### 10 **Conclusions**

11  
12 Due to the influence of certain health conditions on poverty status, health interventions have  
13  
14 the potential to improve national living standards and poverty rates in a similar way that  
15  
16 ‘traditional’ policy responses such as changes to welfare payment currently do. Using a  
17  
18 multidimensional poverty measure reveals the health conditions that should be the focus of  
19  
20 such efforts.  
21  
22  
23  
24  
25  
26  
27  
28  
29  
30  
31  
32  
33  
34  
35  
36  
37  
38  
39  
40  
41  
42  
43  
44  
45  
46  
47  
48  
49  
50  
51  
52  
53  
54  
55  
56  
57  
58  
59  
60

## Article Summary

### *Article Focus*

- Multidimensional poverty status of people with various chronic health conditions
- The influence of costs of disability on multidimensional poverty status

### *Key messages*

- Amongst those who were multidimensionally poor the most commonly reported health conditions were back problems, and arthritis
- Those with depression were nearly 7 times more likely to be multidimensionally poor than those with no health condition
- Equivalising for the additional costs of disability changed the conditions with the highest proportion of individuals in multidimensional poverty

### *Strengths and limitations*

- Uses Australia's first measure of multidimensional poverty
- Takes into consideration education attainment and overall health status (measured by the SF-6D) as well as income when assessing people's poverty status

## INTRODUCTION

Standard of living is a broad concept that loosely relates to the overall life of an individual, and the quality of that life. Poverty studies seek to measure an individual's living standards, with those who have a 'poor' standard of living being seen as living in poverty (1, 2).

Traditionally, poverty has been measured based upon an individual's available income; however, it is now accepted that income gives too narrow a view of an individual's overall living standards and other indicators of living standards are needed (3, 4). The capabilities theory of Sen has been at the forefront of the movement away from the uni-dimensional income approach to poverty measurement, with Sen defining poverty as a lack of freedom due to "the deprivation of basic capabilities" (5). Capabilities are resources, attributes or circumstances that give an individual the capacity to adequately function and engage with the society they live in, and the ability to do things an individual values (5). This shift in conceptualising poverty and living standards has given rise to the now-widespread use of multidimensional poverty measures (6-10). These measures still seek to measure living standards and identify those living in poverty, however they use multiple indicators not just income.

Overall health status imparts a massive impact upon an individual's living standards by directly influencing what physical and mental functioning they can undertake, and is often seen as a basic capability (5, 11-14). Furthermore, health status affects living standards indirectly through limiting education and financial resources: poor health status may reduce the ability to undertake education (15-17), and may also limit economic resources through restricting employment (18-21). For a detailed discussion of how health acts as a key capability and determinant of living standards see (22).

1  
2  
3 In recognition of the importance of good health for adequate living standards, health status  
4 has been included as a key component in numerous measures of poverty (9, 23-25), including  
5 the Freedom Poverty Measure within Australia (22). The Freedom Poverty Measure, a  
6 multidimensional measure of poverty, sees overall health status and education attainment as  
7 impacting upon living standards in a similar way that low income does (22). Under the  
8 Freedom Poverty Measure overall health status, in part, determines poverty status: those in  
9 multidimensional poverty<sup>1</sup> have a low income and either poor overall health status or an  
10 insufficient level of education attainment.  
11  
12  
13  
14  
15  
16  
17  
18  
19

20  
21 Including health in a measure of poverty provides the opportunity for cross-portfolio  
22 responses to improving the living standards of disadvantaged members of society – with  
23 health being seen as key contributor to low living standards, health interventions have the  
24 potential to be a direct policy response to improving living standards alongside existing  
25 measures such as reform to social security arrangements (26). However, different chronic  
26 health conditions are likely to have varying impacts upon living standards, with some  
27 conditions more severely affecting living standards than others<sup>2</sup>. This paper will look at the  
28 relationship between multidimensional poverty, measured using the Freedom Poverty  
29 Measure, and specific chronic health conditions in the Australian population to determine  
30 which chronic health conditions have the largest impact upon living standards and as such  
31 their prevention or treatment should be targeted as a cross-portfolio concern.  
32  
33  
34  
35  
36  
37  
38  
39  
40  
41  
42  
43  
44  
45  
46  
47  
48  
49  
50

---

51 <sup>1</sup> The use of both income measures of poverty and multidimensional measures of poverty in the literature  
52 creates the need to clarify which measure is being used. Hence people may be labelled as being in 'income  
53 poverty' or in 'multidimensional poverty' depending on which measure was used – both refer to a state of low  
54 living standards. The term 'freedom poverty' refers to those who are identified as being in multidimensional  
55 poverty using the Freedom Poverty Measure.

56 <sup>2</sup> Within this paper a chronic health condition refers to a specific ailment that has lasted, or is likely to last, for  
57 six months or more.  
58  
59  
60

## METHODS

### *Data source*

The 2003 Survey of Disability, Ageing and Carers (SDAC) provided the data source for this paper. The SDAC provided detailed self-reported data on socio-demographic status, labour force participation, health and disability status, chronic health conditions, and economic information on individuals and their families<sup>3</sup> (27).

The 2003 SDAC is a comprehensive, nationally representative survey conducted by the Australian Bureau of Statistics (ABS) between 23 June 2003 to 1 November 2003 (28). The survey covered individuals in all states and territories, including both rural and urban populations – however, those in very remote areas were excluded. As these areas make up only 1% of the population, the ABS deemed that this would not affect the robustness of the data (29). Both private dwellings and care-accommodation establishments were included in the sample, with a response rate of 89% for private dwellings and 92% for care-accommodation establishments (30). *Despite the high response rate for the survey, the potential for non-response bias cannot be excluded. It has been noted previously in Australia that people with lower education attainment have been less likely to participate in surveys (31); hence this paper may underestimate the number of people in multidimensional poverty. The ABS sought to reduce non response bias through survey design and estimation procedures (30), and the use of weighted data in this analysis would also reduce non response bias, although it cannot be excluded entirely.* The original 2003 SDAC data was weighted by the ABS *against the 2001 Census of Population and Housing* to represent the Australian

---

<sup>3</sup> At the time of writing this paper the 2003 SDAC was the most current dataset that contains detailed and accurate income, health and education information on the one survey.



1  
2  
3 population in 2003 by broad population variables such as age, sex, state/territory and section  
4  
5 of state (27).  
6  
7

### 8 *Identifying those in freedom poverty*

9

10  
11 In order to determine how various health conditions impact upon living standards the  
12 Freedom Poverty Measure was utilised to identify those in multidimensional poverty. The  
13 Freedom Poverty Measure combines measures of low income, poor health, and insufficient  
14 Freedom Poverty Measure combines measures of low income, poor health, and insufficient  
15 education. The Freedom Poverty Measure was designed specifically for the Australian  
16 population in a manner that is consistent with international poverty measurement practices  
17 (7). For more detailed information on the Freedom Poverty Measure and other examples of  
18 its application see (10, 18, 22, 32).  
19  
20  
21  
22  
23  
24  
25  
26  
27

28 The income, health and education status of individuals was initially identified, as follows:

- 29  
30 - If an individual's family income (measured by the income unit income (29)) was  
31 below the 50% of the median income poverty line then they were considered to have  
32 low income.  
33  
34  
35  
36
- 37 - If an individual had a poorer health utility score (measured by the Short Form 6D (SF-  
38 6D) measure (33)) than the average for their age group they were considered to have  
39 poor overall health status.  
40  
41  
42  
43
- 44 - If an individual had a highest level of education attainment lower than year 12 (for  
45 those aged 25 to 64 years), or lower than Year 10 (for those aged 65 years and over)  
46 they were considered to have an insufficient level of education attainment.  
47  
48  
49  
50

51 Those with low income AND either poor overall health status or an insufficient level of  
52 education attainment were considered to be in 'freedom poverty' and to be  
53 multidimensionally poor.  
54  
55  
56  
57  
58  
59  
60

### *Identifying chronic health conditions*

The 2003 SDAC recorded any chronic health conditions, defined as health conditions that had lasted or were likely to last for six months or more, experienced by respondents. If an individual recorded multiple health conditions then their main chronic health condition was also recorded. The ABS classified respondent's chronic health conditions according to the ICD-10 health coding system. Lists of what ICD-10 codes correspond with different chronic health condition groups can be found in (27). Respondents with Alzheimer's disease and 'certain conditions originating in the perinatal period' were excluded because of their low numbers (less than 10 respondents) on the SDAC.

### *Statistical Analysis*

Initially descriptive statistics were utilised to look at the proportion of people in multidimensional poverty with a long term health condition, the most common conditions experienced by those in multidimensional poverty, and the proportion of people with various conditions in multidimensional poverty.

Following this logistic regression models were utilised to look at the odds ratio of being in multidimensional poverty for those with various chronic health conditions. Those with no chronic health conditions were used as the reference group, and the models were adjusted for age and sex. **Due to the multiple comparisons being made between different chronic health conditions and no health condition (29 separate models were constructed), there is the potential for type I error to be created. To reduce the risk of this, Bonferroni correction has been undertaken with the significance level set to 0.0017 (0.05/29).**

### *Sensitivity Analysis – costs of disability*

1  
2  
3  
4  
5  
6 Ill health can further impact on living standards by imparting additional costs upon  
7  
8 individuals, including the costs of treatment, support services, and medication, and it has  
9  
10 been argued that these costs should be taken into consideration when comparing incomes  
11  
12 (34). Those with chronic health conditions are likely to need higher incomes to obtain the  
13  
14 same level of living standards as those with no chronic health conditions due to the additional  
15  
16 costs of living for those with ill health. There is a small amount of literature that has  
17  
18 developed a possible means of taking these costs into consideration. Internationally this has  
19  
20 been undertaken by Zaidi and Burchardt (34), and within Australia this has been undertaken  
21  
22 by Saunders (35).  
23  
24

25  
26 Using the methods developed by Saunders to measure the costs associated with disability, a  
27  
28 sensitivity analysis was undertaken to look at the difference in the number of people in  
29  
30 multidimensional poverty as a result of accounting for the extra costs of disability. The long  
31  
32 term health conditions associated with multidimensional poverty when the additional costs of  
33  
34 disability in adults were taken into consideration was also examined. It is acknowledged by  
35  
36 the authors that there is a number of limitations to this approach, including the exclusion of  
37  
38 children in the methods developed by Saunders and also possible limitations in the use of  
39  
40 disability classification to estimate the costs of health (36). However, this sensitivity will still  
41  
42 provide an example of how taking into consideration the costs of disability will affect the  
43  
44 financial situation of individuals and hence the numbers in multidimensional poverty.  
45  
46  
47  
48

## **RESULTS**

49  
50  
51  
52  
53 There were 35 704 respondents in the SDAC, and of these 3 469 were in multidimensional  
54  
55 poverty. Once weighted these data represented 19 320 000 individuals in the 2003 Australian  
56  
57  
58  
59  
60

1  
2  
3 population in private households, of which 1 857 000 were multidimensionally poor (10%).

4  
5 Of the Australian population in 2003, 40% identified having a long term health condition.

6  
7  
8 Not all individuals with a chronic health condition had poor overall health status, with 74% of  
9  
10 individuals with a chronic health condition having good overall health status, indicating that  
11  
12 their health condition had only a mild impact on their overall health status. Table 1 shows the  
13  
14 overall health status of those with various chronic health conditions. Conditions with a  
15  
16 relatively low proportion of individuals reporting poor overall health status included high  
17  
18 cholesterol, hypertension and asthma.  
19  
20

21  
22 Amongst those who were multidimensionally poor, 75% identified having a chronic health  
23  
24 condition. Of those with a chronic health condition, 18% were in multidimensional poverty;  
25  
26 whereas for those with no chronic health condition 4% were in multidimensional poverty  
27  
28 (Table 2). Those with a long term health condition were 3 times more likely to be in  
29  
30 multidimensional poverty than those with no health condition, after controlling for age and  
31  
32 sex (OR 3.38, 95% CI: 3.06 – 3.76,  $p < .0001$ ).  
33  
34  
35

36  
37 Amongst those in multidimensional poverty the most common health conditions were back  
38  
39 problems (11% of those in multidimensional poverty had back problems), arthritis and related  
40  
41 disorders (11%), followed by mental and behavioural disorders (9%), hypertension (4%),  
42  
43 asthma (4%) and injury/accident (4%). Amongst the individual health conditions, the  
44  
45 condition with the highest proportion in multidimensional poverty was depression/mood  
46  
47 affecting disorders (26% were in multidimensional poverty), mental and behavioural  
48  
49 disorders (22% were in multidimensional poverty), certain infectious and parasitic diseases  
50  
51 (22% were in multidimensional poverty), and diseases of the respiratory system (22% were in  
52  
53 multidimensional poverty) (Table 3).  
54  
55  
56  
57  
58  
59  
60

1  
2  
3 After controlling for age and sex there was no significant difference in the likelihood of being  
4  
5 in multidimensional poverty between those with no chronic health condition and those with  
6  
7 high cholesterol ( $p=0.3794$ ), deafness/noise induced hearing loss ( $p=0.3938$ ), conditions  
8  
9 grouped by the ABS into 'other 2003 codes which had no ICD-10 equivalent' ( $p=0.2993$ ),  
10  
11 **mental and behavioural disorders ( $p=0.0441$ ), diseases of the blood and blood forming organs**  
12  
13 **( $p=0.0036$ ), diabetes ( $p=0.0441$ ), and diseases of the genitourinary system (0.0018).** Those  
14  
15 with depression/mood affecting disorders were nearly 7 times (OR 6.60, 95% CI: 5.09 – 8.55,  
16  
17  $p<.0001$ ) more likely to be in multidimensional poverty than those with no chronic health  
18  
19 condition. The odds of being in multidimensional poverty for other chronic health conditions,  
20  
21 compared to those with no health condition are shown in Table 3.  
22  
23  
24

#### 25 26 *Costs of disability* 27

28  
29 Before equivalising income for disability status there were 1 875 000 individuals in  
30  
31 multidimensional poverty. After equivalising family income for the costs of disability in  
32  
33 adults there were 2 462 000 individuals in multidimensional poverty. After equivalising  
34  
35 income for the costs of disability in adults, 82% of people in multidimensional poverty  
36  
37 identified having a chronic health condition – an increase of 8 percentage points. Of those  
38  
39 with a chronic health condition, 27% were in multidimensional poverty; whereas for those  
40  
41 with no chronic health condition 5% were in multidimensional poverty after equivalising for  
42  
43 the costs of disability. Those with a chronic health condition were now more than 5 times  
44  
45 more likely to be in multidimensional poverty than those with no chronic health condition,  
46  
47 after controlling for age and sex (OR 5.57, 95% CI: 5.07 – 6.12,  $p<.0001$ ).  
48  
49  
50

51  
52 After equivalising for the costs of disability in adults, the most common chronic health  
53  
54 conditions amongst those in multidimensional poverty were still arthritis and related  
55  
56  
57  
58  
59  
60

1  
2  
3 disorders (13%), back problems (12%), mental and behavioural disorders (9%), hypertension  
4  
5 (5%) and asthma (4%). The conditions with the highest proportion of individuals in  
6  
7 multidimensional poverty were diseases of the respiratory system (43% were in  
8  
9 multidimensional poverty) and other diseases of the circulatory system (41% were in  
10  
11 multidimensional poverty). The proportion of individuals in multidimensional poverty in  
12  
13 each of these conditions increased after taking into consideration the costs of disability in  
14  
15 adults when equivalising income, and the conditions with the highest proportion of  
16  
17 individuals in multidimensional poverty also changed (Table 4).  
18  
19

20  
21  
22 After controlling for age and sex, those with mental and behavioural disorders were nearly 14  
23  
24 times more likely to be in multidimensional poverty than those with no health condition after  
25  
26 equivalising income for disability in adults (OR 13.83, 95% CI: 11.76 – 16.26,  $p < .0001$ ). All  
27  
28 chronic health conditions with the exception of high cholesterol ( $p = 0.9623$ ) were  
29  
30 significantly more likely to be in multidimensional poverty than those with no chronic health  
31  
32 condition (Table 4).  
33  
34

## 35 36 **DISCUSSION**

37  
38  
39 The results have shown that those with a chronic health condition were significantly more  
40  
41 likely to be in multidimensional poverty than those without a chronic health condition, with  
42  
43 18% of those with a chronic health condition being in multidimensional poverty, compared to  
44  
45 only 4% of those without a chronic health condition. Of those in multidimensional poverty,  
46  
47 74% had a long term health condition.  
48  
49

50  
51 The results of the sensitivity analysis show that after equivalising income for adult disability,  
52  
53 there was a 3 percentage point increase in the proportion of the population in  
54  
55 multidimensional poverty, and a 9 percentage point increase in the proportion of individuals  
56  
57

1  
2  
3 with a chronic health condition in multidimensional poverty. However, there is opportunity to  
4 improve the methods by which the costs of ill health are produced by including children in  
5 the methodology and having further consideration as to how health is measured. In spite of  
6 this, the sensitivity analysis has shown the additional burden chronic health conditions can  
7 have upon living standards – through the economic burden placed upon families as a result of  
8 disability.  
9

10  
11  
12  
13  
14  
15  
16  
17 Chronic health conditions impact upon living standards in a number of ways. Having a  
18 chronic health condition results in an increased likelihood of being out of the labour force  
19 (19), with recent Australian studies showing that being out of the labour force is associated  
20 with low incomes and high rates of income poverty (37, 38). Furthermore, having a chronic  
21 health condition is likely to affect an individual's overall health status – however, as this  
22 study has shown, different chronic health conditions have varying impacts upon overall  
23 health status, with some chronic health conditions such as hypertension or asthma having few  
24 people reporting poor overall health status.  
25  
26  
27  
28  
29  
30  
31  
32  
33  
34  
35

36 The chronic health conditions most commonly associated with multidimensional poverty  
37 were arthritis and related disorders, back problems and mental and behavioural disorders – all  
38 of which have been shown to be preventable. There are numerous interventions for each of  
39 these conditions that have been shown to be cost-effective in either preventing the onset of  
40 the condition or reducing the severity of the condition (39-42). When considering the  
41 additional costs of low living standards the further benefits of such intervention programs  
42 become more apparent.  
43  
44  
45  
46  
47  
48  
49  
50

51  
52  
53 Political rhetoric is currently shifting to advocate the use of cross-portfolio responses to  
54 social issues (43). As such, there is opportunity for health interventions to be taken up in  
55  
56  
57  
58  
59  
60

1  
2  
3 government departments other than those traditionally responsible for health care, and be  
4 included alongside other efforts to improve living standards such as education and skills  
5 reform, and social security reform. Using the Freedom Poverty Measure reveals the chronic  
6 health conditions that are experienced by the most disadvantaged people in society and  
7 should be the focus of political efforts to improve living standards.  
8  
9  
10  
11  
12

#### 13 14 15 FUNDING SOURCE

16  
17  
18 This study was funded partly by an National Health and Medical Research Council  
19 (NHMRC) Doctoral Scholarship and an NHMRC Early Career Fellowship.  
20  
21  
22  
23  
24  
25  
26  
27  
28  
29  
30  
31  
32  
33  
34  
35  
36  
37  
38  
39  
40  
41  
42  
43  
44  
45  
46  
47  
48  
49  
50  
51  
52  
53  
54  
55  
56  
57  
58  
59  
60



**REFERENCES**

1. Greenwell H, Lloyd R, Harding A. An introduction to poverty measurement issues. Canberra: National Centre for Social and Economic Modelling (NATSEM)2001.
2. Townsend P. Poverty in the United Kingdom. Harmondsworth: Penguin; 1979.
3. Travers P, Richardson S. Living Decently: Material well-being in Australia. Melbourne: Oxford University Press; 1993.
4. Stiglitz J, Sen A, Fitoussi J. Report by the Commission on the Measurement of Economic Performance and Social Progress. Paris: Commission on the Measurement of Economic Performance and Social Progress2009.
5. Sen AK. Development as Freedom. Oxford: Oxford University Press; 1999.
6. Alkire S, Santos M. A Multidimensional Approach: Poverty Measurement & Beyond. Social Indicators Research. 2013;112(2):239-57.
7. Alkire S, Foster JE. Counting and multidimensional poverty measurement. Journal of Public Economics. 2011;95(7-8):476-87.
8. United Nations Development Programme. Human Development Report 2008. New York: United Nations2008.
9. United Nations Development Programme. Multidimensional Poverty Index. New York: United Nations Development Programme; 2010 [cited 2011 21 May]; Available from: <http://hdr.undp.org/en/statistics/mpi/>.
10. Callander E, Schofield D, Shrestha R. Multi-dimensional poverty in Australia and the barriers ill health imposes on the employment of the disadvantaged. Journal of Socio Economics. 2011;40:736-42.
11. Council of Australian Governments. Human Capital Reform. Canberra: Council of Australian Governments; 2006.
12. Council of Australian Governments. Council of Australian Governments Meeting 10 February 2006 Communique.

1  
2  
3 [http://www.alga.asn.au/newsroom/communiques/01.coag/COAG\\_Communique\\_20060210.pdf](http://www.alga.asn.au/newsroom/communiques/01.coag/COAG_Communique_20060210.pdf):  
4  
5

6 COAG2006.

- 7 13. Sen AK. Human capital and human capability. *World Development*. 1997;25(12):1959-61.  
8  
9  
10 14. Sen AK. *Public Health, ethics and equity*. Oxford: Oxford University Press; 2004.  
11  
12 15. Mushkin SJ. Health as an investment. *The Journal of Political Economy*. 1962;70(5):129-57.  
13  
14 16. Laplagne P, Glover M, Shomos A. *Effects of health and education on labour force*  
15 *participation*. Canberra: Productivity Commission2007.  
16  
17 17. Australian Bureau of Statistics. *Australian Social Trends*, March 2011. Canberra: ABS2011.  
18  
19 20 18. Callander E, Schofield D, Shrestha R. Capacity for freedom - a new way of measuring poverty  
21 *amongst Australian children*. *Child Indicators Research*. 2012;5(1):179-98.  
22  
23 25 19. Schofield D, Shrestha R, Passey M, Earnest A, Fletcher S. Chronic disease and labour force  
26 *participation among older Australians*. *Medical Journal of Australia*. 2008;189(8):447-50.  
27  
28 30 20. Nepal B, Payne A, Brown L. *Healthy, wealthy and wise? The relationship between health,*  
31 *employment and earnings in Australia*. Sydney: AMP2009.  
32  
33 34 21. Schofield D, Kelly S, Shrestha R, Callander E, Passey M, Percival R. Long term financial  
35 *impacts of CVD: Living standards in retirement*. *International Journal of Cardiology*. 2010;155(3):406-  
36 08.  
37  
38 39 22. Callander E, Schofield D, Shrestha R. *Towards a holistic understanding of poverty: a new*  
40 *multidimensional measure of poverty for Australia*. *Health Sociology Review*. 2012;21(2):138-52.  
41  
42 43 23. Lugo MA. *Comparing Multidimensional Indices of Inequality: methods and application*.  
44 *Research on Economic Inequality*. 2007;14:213-36.  
45  
46 47 24. Nilsson T. *Measuring Changes in Multidimensional Inequality-An Empirical Application*2007.  
48  
49 50 25. Noble M, McLennan D, Wilkinson K, Whitworth A, Exley S, Barnes H, et al. *The English indices*  
51 *of deprivation 2010*. London: Department of Communities and Local Government2010.  
52  
53  
54  
55  
56  
57  
58  
59  
60

- 1  
2  
3 26. Swan W. Budget Speech 2011-12. Online: <http://www.budget.gov.au/2011-12/content/speech/html/speech.htm>; Australian Government; 2011.  
4  
5  
6  
7 27. Australian Bureau of Statistics. Information Paper - Basic Confidentialised Unit Record File: Survey of Disability, Ageing and Carers 2003 (reissue) Canberra: ABS2004.  
8  
9  
10  
11 28. Australian Bureau of Statistics. Disability, ageing and carers, Australia: Users guide 4431.0.55.001. Canberra: ABS; 2004.  
12  
13  
14  
15 29. Australian Bureau of Statistics. Information Paper - Basic Confidentialised Unit Record File: Survey of Disability, Ageing and Carers 2003 (reissue) Canberra: ABS2005.  
16  
17  
18  
19  
20 30. Australian Bureau of Statistics. Information Paper - Disability, Ageing and Carers, Australia: User Guide ABS 4431.0.55.001. Canberra: ABS; 2003.  
21  
22  
23  
24 31. Turrell G, Patterson C, Oldenburg B, Gould T, Roy M-A. The socio-economic patterning of survey participation and non-response error in a multilevel study of food purchasing behaviour: area-and individual-level characteristics. *Public health nutrition*.6(2):181-90.  
25  
26  
27  
28  
29  
30 32. Callander E, Schofield D, Shrestha R. Freedom poverty: A new tool to identify the multiple disadvantages affecting those with CVD. *International Journal of Cardiology*. 2013;166(2):321-6.  
31  
32  
33  
34 33. Brazier JE, Roberts J. The Estimation of a Preference-Based Measure of Health From the SF-12. *Medical Care*. 2004;42:851-9.  
35  
36  
37  
38 34. Zaidi A, Burchardt T. Comparing incomes when needs differ: Equivalization for the extra costs of disability in the U.K. *Review of Income and Wealth*. 2005;51(1):89-114.  
39  
40  
41  
42 35. Saunders P. The costs of disability and the incidence of poverty. Sydney: Social Policy Research Centre (SPRC), University of New South Wales2006.  
43  
44  
45  
46 36. Mont D. Measuring Disability Prevalence, SP Discussion Paper. New York: The World Bank2007.  
47  
48  
49  
50  
51 37. Schofield D, Shrestha R, Percival R, Passey M, Kelly S, Callander E. Economic Impacts of Illness in Older Workers: Quantifying the impact of illness on income, tax revenue and government spending. *BMC Public Health*. 2011;11(418).  
52  
53  
54  
55  
56  
57  
58  
59  
60

- 1  
2  
3 38. Schofield DJ, Callander EJ, Shrestha RN, Percival R, Kelly SJ, Passey ME. Premature  
4 retirement due to ill health and income poverty: a cross-sectional study of older workers. *BMJ Open*.  
5 2013;3(5).  
6  
7  
8  
9 39. Vos T, Carter R, Barendregt JJ, Mihalopoulos C, Veerman L, Magnus A, et al. Assessing Cost-  
10 Effectiveness in Prevention (ACE Prevention): Final Report. Brisbane and Melbourne: University of  
11 Queensland and Deakin University 2010.  
12  
13  
14 40. Puolakka K, Kautiainen H, Mottonen T, Hannonen P, Korpela M, Julkunen H, et al. Impact of  
15 initial aggressive drug treatment with a combination of disease-modifying antirheumatic drugs on  
16 the development of work disability in early rheumatoid arthritis: a five-year randomized followup  
17 trial. *Arthritis Rheum*. 2004 Jan;50(1):55-62.  
18  
19  
20  
21  
22 41. Linton SJ, van Tulder MW. Preventive Interventions for Back and Neck Pain Problems: What  
23 is the Evidence? *Spine*. 2001;26(7):778-87.  
24  
25  
26 42. Barretta B, Byford S, Knappa M. Evidence of cost-effective treatments for depression: a  
27 systematic review. *Journal of Affective Disorders* 2005;84:1-13.  
28  
29  
30 43. Social Inclusion Unit. The Australian Public Service Social Inclusion policy design and delivery  
31 toolkit In: Department of the Prime Minister and Cabinet, editor. Canberra 2009.  
32  
33  
34  
35  
36  
37  
38  
39  
40  
41  
42  
43  
44  
45  
46  
47  
48  
49  
50  
51  
52  
53  
54  
55  
56  
57  
58  
59  
60

**Table 1: Overall health status of those with different chronic health conditions**

| <b>Long term health condition</b>                                    | <b>Proportion with poor overall health status, measured by SF-6D</b> |
|----------------------------------------------------------------------|----------------------------------------------------------------------|
| Depression/ mood affective disorders                                 | 22%                                                                  |
| Congenital malformations, deformations and chromosomal abnormalities | 49%                                                                  |
| Symptoms/signs and abnormal clinical and laboratory findings n.e.c   | 36%                                                                  |
| Certain infectious and parasitic diseases                            | 41%                                                                  |
| Mental and behavioural disorders                                     | 46%                                                                  |
| Diseases of the respiratory system                                   | 42%                                                                  |
| Other injury/poisoning                                               | 40%                                                                  |
| Injury/accident                                                      | 25%                                                                  |
| Diseases of the blood and blood forming organs                       | 52%                                                                  |
| Back problems                                                        | 32%                                                                  |
| Diseases of the skin and subcutaneous tissues                        | 28%                                                                  |
| Other diseases of the musculoskeletal system and connective tissue   | 40%                                                                  |
| Arthritis and related disorders                                      | 31%                                                                  |
| Heart Disease                                                        | 33%                                                                  |
| Diseases of the eye and adnexa                                       | 33%                                                                  |
| Other diseases of the circulatory system                             | 43%                                                                  |
| Diabetes                                                             | 12%                                                                  |
| Neoplasms (tumours/cancers)                                          | 33%                                                                  |
| Diseases of the ear and mastoid process                              | 23%                                                                  |
| Diseases of the nervous system                                       | 27%                                                                  |
| Diseases of the digestive system                                     | 17%                                                                  |
| Diseases of the genitourinary system                                 | 17%                                                                  |
| Asthma                                                               | 10%                                                                  |
| Hypertension                                                         | 5%                                                                   |
| Other endocrine/nutritional and metabolic disorders                  | 11%                                                                  |
| Other                                                                | 32%                                                                  |
| Deafness/hearing loss                                                | 15%                                                                  |
| High cholesterol                                                     | 2%                                                                   |

**Table 2: Number of individuals in multidimensional poverty by health status, 2003**

|                                            | <b>In Multidimensional Poverty</b> | <b>Not in Multidimensional Poverty</b> |
|--------------------------------------------|------------------------------------|----------------------------------------|
| Has a long term health condition           | 1 387 000                          | 6 371 000                              |
| Does not have a long term health condition | 449 000                            | 11 113 000                             |

For peer review only

**Table 3: Multidimensional poverty status of those with varying long term health conditions, 2003**

| Long term health condition                                           | Total number | Proportion in multidimensional poverty | Number in multidimensional poverty | OR   | 95% CI    |       | p-value |
|----------------------------------------------------------------------|--------------|----------------------------------------|------------------------------------|------|-----------|-------|---------|
| No condition                                                         | 11 562 200   | 4%                                     | 488 700                            |      | REFERENCE |       |         |
| Depression/ mood affective disorders                                 | 208 400      | 28%                                    | 57 300                             | 6.60 | 5.09      | 8.55  | <.0001  |
| Congenital malformations, deformations and chromosomal abnormalities | 48 200       | 17%                                    | 8 000                              | 5.53 | 3.07      | 9.99  | <.0001  |
| Symptoms/signs and abnormal clinical and laboratory findings n.e.c   | 124 700      | 24%                                    | 29 500                             | 4.71 | 3.29      | 6.76  | <.0001  |
| Certain infectious and parasitic diseases                            | 28 200       | 24%                                    | 6 800                              | 4.66 | 2.36      | 9.17  | <.0001  |
| Mental and behavioural disorders                                     | 621 800      | 27%                                    | 164 900                            | 4.60 | 1.04      | 20.35 | 0.0441  |
| Diseases of the respiratory system                                   | 127 900      | 27%                                    | 34 200                             | 4.49 | 3.24      | 6.23  | <.0001  |
| Other injury/poisoning                                               | 65 900       | 23%                                    | 14 900                             | 4.17 | 2.63      | 6.62  | <.0001  |
| Injury/accident                                                      | 434 700      | 17%                                    | 74 900                             | 3.85 | 3.11      | 4.77  | <.0001  |
| Diseases of the blood and blood forming organs                       | 17 200       | 22%                                    | 3 700                              | 3.72 | 1.53      | 9.00  | 0.0036  |
| Back problems                                                        | 1 128 200    | 19%                                    | 210 100                            | 3.49 | 3.01      | 4.04  | <.0001  |
| Diseases of the skin and subcutaneous tissues                        | 65 700       | 15%                                    | 9 900                              | 3.41 | 2.06      | 5.65  | <.0001  |
| Other diseases of the musculoskeletal system and connective tissue   | 251 600      | 22%                                    | 56 300                             | 3.35 | 2.59      | 4.33  | <.0001  |
| Arthritis and related disorders                                      | 902 200      | 23%                                    | 207 200                            | 3.27 | 2.79      | 3.83  | <.0001  |
| Heart Disease                                                        | 225 100      | 23%                                    | 52 300                             | 3.24 | 2.47      | 4.26  | <.0001  |
| Diseases of the eye and adnexa                                       | 99 800       | 19%                                    | 19 100                             | 3.18 | 2.08      | 4.86  | <.0001  |
| Other diseases of the                                                | 122 600      | 22%                                    | 27 600                             | 3.13 | 2.21      | 4.44  | <.0001  |

|                                                              |         |     |        |      |      |      |        |
|--------------------------------------------------------------|---------|-----|--------|------|------|------|--------|
| circulatory system                                           |         |     |        |      |      |      |        |
| Diabetes                                                     | 271 100 | 19% | 51 700 | 2.99 | 2.31 | 3.87 | 0.0441 |
| Neoplasms<br>(tumours/cancers)                               | 97 000  | 19% | 18 800 | 2.90 | 1.92 | 4.37 | <.0001 |
| Diseases of the ear<br>and mastoid process                   | 284 800 | 10% | 47 800 | 2.73 | 2.08 | 3.59 | <.0001 |
| Diseases of the<br>nervous system                            | 491 800 | 13% | 65 500 | 2.67 | 2.14 | 3.32 | <.0001 |
| Diseases of the<br>digestive system                          | 154 100 | 14% | 21 900 | 2.37 | 1.67 | 3.38 | <.0001 |
| Diseases of the<br>genitourinary system                      | 70 800  | 14% | 9 900  | 2.28 | 1.36 | 3.82 | 0.0018 |
| Asthma                                                       | 925 200 | 8%  | 76 600 | 2.01 | 1.65 | 2.44 | <.0001 |
| Hypertension                                                 | 604 200 | 14% | 83 200 | 1.84 | 1.50 | 2.26 | <.0001 |
| Other<br>endocrine/nutritional<br>and metabolic<br>disorders | 87 300  | 10% | 8 500  | 1.55 | 0.92 | 2.62 | 0.1015 |
| Other                                                        | 44 700  | 11% | 4 812  | 1.48 | 0.71 | 3.10 | 0.2993 |
| Deafness/hearing<br>loss                                     | 153 300 | 8%  | 12 975 | 1.22 | 0.77 | 1.94 | 0.3938 |
| High cholesterol                                             | 92 900  | 6%  | 5 211  | 0.77 | 0.43 | 1.39 | 0.3794 |



**Table 4: Multidimensional poverty status of those with varying long term health conditions, after equivalising income for the cost of disability in adults, 2003**

| <b>Long term health condition</b>                                    | <b>Proportion in multidimensional poverty</b> | <b>Number in multidimensional poverty</b> | <b>OR</b> | <b>95% CI</b> |       | <b>p-value</b> |
|----------------------------------------------------------------------|-----------------------------------------------|-------------------------------------------|-----------|---------------|-------|----------------|
| No condition                                                         | 4%                                            | 440 500                                   |           | REFERENCE     |       |                |
| Mental and behavioural disorders                                     | 36%                                           | 220 900                                   | 13.83     | 11.76         | 16.26 | <.0001         |
| Depression/mood affective disorders                                  | 34%                                           | 71 600                                    | 9.86      | 7.72          | 12.61 | <.0001         |
| Congenital malformations, deformations and chromosomal abnormalities | 23%                                           | 10 900                                    | 9.82      | 5.70          | 16.92 | <.0001         |
| Certain infectious and parasitic diseases                            | 38%                                           | 10 900                                    | 9.58      | 5.20          | 17.64 | <.0001         |
| Diseases of the respiratory system                                   | 43%                                           | 55 100                                    | 9.13      | 6.75          | 12.35 | <.0001         |
| Other injury/poisoning                                               | 35%                                           | 23 000                                    | 7.84      | 5.25          | 11.71 | <.0001         |
| Other diseases of the circulatory system                             | 41%                                           | 49 800                                    | 7.00      | 5.18          | 9.47  | <.0001         |
| Symptoms/signs and abnormal clinical and laboratory findings n.e.c   | 31%                                           | 38 400                                    | 6.97      | 4.93          | 9.85  | <.0001         |
| Diseases of the blood and blood forming organs                       | 33%                                           | 5 700                                     | 6.94      | 3.40          | 14.17 | <.0001         |
| Diseases of the skin and subcutaneous tissues                        | 24%                                           | 15 700                                    | 6.69      | 4.35          | 10.30 | <.0001         |
| Other diseases of the musculoskeletal system and connective tissue   | 36%                                           | 91 400                                    | 6.48      | 5.17          | 8.13  | <.0001         |
| Diseases of the eye and adnexa                                       | 31%                                           | 31 300                                    | 6.19      | 4.22          | 9.08  | <.0001         |
| Injury/accident                                                      | 23%                                           | 102 000                                   | 6.07      | 5.00          | 7.37  | <.0001         |
| Back problems                                                        | 27%                                           | 305 400                                   | 5.80      | 5.08          | 6.63  | <.0001         |
| Arthritis and related disorders                                      | 35%                                           | 316 300                                   | 5.63      | 4.88          | 6.50  | <.0001         |
| Heart Disease                                                        | 36%                                           | 80 600                                    | 5.53      | 4.35          | 7.05  | <.0001         |
| Neoplasms (tumours/cancers)                                          | 32%                                           | 31 200                                    | 5.52      | 3.90          | 7.83  | <.0001         |
| Diseases of the nervous system                                       | 20%                                           | 100 300                                   | 4.77      | 3.94          | 5.78  | <.0001         |
| Diabetes                                                             | 26%                                           | 70 600                                    | 4.31      | 3.42          | 5.45  | <.0001         |
| Diseases of the ear and                                              | 24%                                           | 68 500                                    | 4.23      | 3.32          | 5.39  | <.0001         |

|                                                     |     |         |      |      |      |        |
|-----------------------------------------------------|-----|---------|------|------|------|--------|
| mastoid process                                     |     |         |      |      |      |        |
| Other                                               | 26% | 11 600  | 4.22 | 2.45 | 7.26 | <.0001 |
| Diseases of the digestive system                    | 22% | 34 400  | 4.14 | 3.07 | 5.60 | <.0001 |
| Diseases of the genitourinary system                | 22% | 15 400  | 3.92 | 2.52 | 6.09 | <.0001 |
| Asthma                                              | 11% | 104 400 | 3.18 | 2.67 | 3.79 | <.0001 |
| Hypertension                                        | 18% | 110 000 | 2.42 | 2.01 | 2.92 | <.0001 |
| Other endocrine/nutritional and metabolic disorders | 13% | 11 600  | 2.24 | 1.40 | 3.56 | 0.0007 |
| Deafness/hearing loss                               | 15% | 22 300  | 2.13 | 1.46 | 3.08 | <.0001 |
| High cholesterol                                    | 8%  | 7 000   | 1.01 | 0.59 | 1.74 | 0.9623 |
